# Supplementary material for: Acceptability to patients of screening disposable transnasal endoscopy: qualitative interview analysis
Source: PubMed Central journal article supplement — BMJ Open. 2019 Dec 11;9(12):e030467. doi: 10.1136/bmjopen-2019-030467 (PMC6924752; doi:10.1136/bmjopen-2019-030467), 2019-12-11
Supplement: bmjopen-2019-030467.draft_revisions.pdf [file bmjopen-2019-030467.draft_revisions.pdf]

# BMJ Open

BMJ Open is committed to open peer review. As part of this commitment we make the peer review history of every article we publish publicly available.

When an article is published we post the peer reviewers' comments and the authors' responses online. We also post the versions of the paper that were used during peer review. These are the versions that the peer review comments apply to.

The versions of the paper that follow are the versions that were submitted during the peer review process. They are not the versions of record or the final published versions. They should not be cited or distributed as the published version of this manuscript.

BMJ Open is an open access journal and the full, final, typeset and author-corrected version of record of the manuscript is available on our site with no access controls, subscription charges or pay-per-view fees (<http://bmjopen.bmj.com>).

If you have any questions on BMJ Open's open peer review process please email [info.bmjopen@bmj.com](mailto:info.bmjopen@bmj.com)

# BMJ Open

## Acceptability to patients of screening disposable transnasal endoscopy: qualitative interview analysis

|                               |                                                                                                                                                                                                                                                                                                                                                                                                                                                                                                                                                                                          |
|-------------------------------|------------------------------------------------------------------------------------------------------------------------------------------------------------------------------------------------------------------------------------------------------------------------------------------------------------------------------------------------------------------------------------------------------------------------------------------------------------------------------------------------------------------------------------------------------------------------------------------|
| Journal:                      | <i>BMJ Open</i>                                                                                                                                                                                                                                                                                                                                                                                                                                                                                                                                                                          |
| Manuscript ID                 | bmjopen-2019-030467                                                                                                                                                                                                                                                                                                                                                                                                                                                                                                                                                                      |
| Article Type:                 | Original research                                                                                                                                                                                                                                                                                                                                                                                                                                                                                                                                                                        |
| Date Submitted by the Author: | 19-Mar-2019                                                                                                                                                                                                                                                                                                                                                                                                                                                                                                                                                                              |
| Complete List of Authors:     | McGoran, John; University Hospitals of Leicester NHS Trust, Bennett, Andrea; Nottingham University Hospitals NHS Trust<br>Cooper, Joanne; Nottingham University Hospitals NHS Trust, Corporate<br>De Caestecker, John; University Hospitals of Leicester NHS Trust<br>Lovat, Laurence; University College London, Division of Surgery and<br>Interventional Science<br>Guha, Neil; Nottingham University Hospitals NHS Trust<br>Ragunath, Krish; Nottingham University Hospitals NHS Trust<br>Sami, Sarmed; University College London, Division of Surgery and<br>Interventional Science |
| Keywords:                     | Endoscopy < GASTROENTEROLOGY, Oesophageal disease < GASTROENTEROLOGY, Hepatology < INTERNAL MEDICINE                                                                                                                                                                                                                                                                                                                                                                                                                                                                                     |
|                               |                                                                                                                                                                                                                                                                                                                                                                                                                                                                                                                                                                                          |

SCHOLARONE™  
Manuscripts

1  
2  
3  
4  
5  
6  
7  
8  
9  
10  
11  
12  
13  
14  
15  
16  
17  
18  
19  
20  
21  
22  
23  
24  
25  
26  
27  
28  
29  
30  
31  
32  
33  
34  
35  
36  
37  
38  
39  
40  
41  
42  
43  
44  
45  
46  
47  
48  
49  
50  
51  
52  
53  
54  
55  
56  
57  
58  
59  
60

## Acceptability to patients of screening disposable transnasal endoscopy: qualitative interview analysis

John J McGoran<sup>1</sup>, Andrea Bennett<sup>2</sup>, Joanne Cooper<sup>2</sup>, John de Caestecker<sup>1</sup>, Laurence  
B. Lovat<sup>3</sup>, Indra Neil Guha<sup>2</sup>, Krish Ragunath<sup>2</sup>, Sarmed S. Sami<sup>3</sup>

<sup>1</sup>Digestive Diseases Centre, University Hospitals of Leicester NHS Trust, UK

<sup>2</sup>National Institute for Health Research (NIHR) Biomedical Research Center in  
Gastrointestinal and Liver Diseases at Nottingham University Hospitals NHS Trust and  
the University of Nottingham, Queens Medical Center Campus, Nottingham, UK.

<sup>3</sup>Division of Surgery and Interventional Science, University College London, London,  
UK.

Correspondence to: John J McGoran [jmcgoran01@qub.ac.uk](mailto:jmcgoran01@qub.ac.uk)

Short Title: Transnasal endoscopy: Qualitative analysis

Word Count (excluding references and figures/tables):

## Abstract

### Objectives

Screening in selected at-risk populations for Barrett's oesophagus (BO) and oesophageal varices (OVs) has been proposed, but there are obstacles with conventional oesophagogastroduodenoscopy (C-OGD), including patient acceptability. Portable and disposable office-based transnasal endoscopy (TNE) is a feasible and accurate alternative to C-OGD that may have use in primary and secondary care. This article outlines a qualitative analysis of patient experiences of TNE and C-OGD in order to gain an insight into an acceptable delivery of an endoscopic screening service.

### Design

Purposeful sampling identified 23 participants who then underwent semi-structured interviews to determine their experiences of both procedures. Thematic analysis was conducted to derive meaning from their lived experiences.

### Setting

A secondary care endoscopy unit, clinic room and interview room.

### Participants

Patients referred for BO or OV surveillance and for endoscopy to investigate dyspepsia underwent unsedated TNE using the EG Scan II device followed by C-OGD with or without sedation, as part of a clinical trial(1,2).

### Results

The themes that arose from our analysis were: inclusivity in one's own health care; comfort level and convenience; validity of the procedure and application to a screening population; and a sense of altruism and reciprocity.

1  
2  
3 Positive aspects of TNE included participant empowerment, reduced discomfort and  
4 avoidance of conscious sedation. Participants felt that if TNE screening was of proven  
5 efficacy it would be welcomed, though views on use in a community setting were  
6 mixed.  
7  
8  
9  
10  
11

## 12 **Conclusions**

13  
14 Most patients preferred TNE to unsedated C-OGD and the reasons they gave featured  
15 strongly in the emerging themes. This information identifies opportunities and  
16 challenges in establishing an endoscopic screening service.  
17  
18  
19  
20  
21  
22  
23  
24  
25  
26  
27

28 Keywords: endoscopy, oesophageal disease, hepatology  
29  
30  
31

## 32 **Strengths and Limitations of the study**

- 33  
34  
35  
36  
37  
38  
39  
40  
41  
42  
43  
44  
45  
46  
47  
48  
49  
50  
51  
52  
53  
54  
55  
56  
57  
58  
59  
60
- The size of the original study, in which 100 patients from this centre alone allowed for a broad stated aim and collection of participants until data saturation was reached.
  - Every participant had clinic-based TNE before C-OGD so their experiences of the TNE would reflect that of a person undergoing screening more so than if C-OGD was done first.
  - The advantage in performing thematic analysis on this group of patients is that it allowed us to develop clear themes with supporting data, which could allow transferability to other potential screening populations. It is highly likely the same themes would have been derived from interviews of participants from any

1  
2  
3 of the study centres and the conclusions could apply to many locations or  
4  
5 healthcare systems.  
6

- 7
- 8 • Qualitative research can be prone to claims of poor scientific rigour; however,  
9  
10 the framework by which the validity and reliability of a study is evaluated is  
11  
12 subject to standard quantitative criteria. To maximise the credibility and  
13  
14 dependability of the findings, reflexivity, in which the impact of the researcher  
15  
16 and social environment on each other is acknowledged and managed, was  
17  
18 employed at each stage. Care was taken not to manipulate participants into  
19  
20 giving accounts that favoured or condemned either endoscopic test.  
21  
22
  - 23 • The index of transferability for the findings within this study for other screening  
24  
25 modalities and investigations is limited.  
26  
27  
28  
29  
30  
31  
32  
33  
34  
35  
36  
37  
38  
39  
40  
41  
42  
43  
44  
45  
46  
47  
48  
49  
50  
51  
52  
53  
54  
55  
56  
57  
58  
59  
60

## Introduction

Several authorities have highlighted the need to identify alternative, minimally-invasive screening tests for Barrett's oesophagus (BO) and oesophageal varices (OV) which are precursor conditions for oesophageal adenocarcinoma (OAC) and variceal bleeding, respectively(3–6). The incidence and mortality from OAC has risen rapidly over the last few decades(7). This has prompted efforts to screen at risk patients who are white, male, age 55 or over, with chronic reflux symptoms for BO(6). Similarly, incidence and mortality from chronic liver disease is also rising, with one of the major contributors being variceal haemorrhage(6). It is recommended practice to screen for varices using endoscopy in all patients with cirrhosis but the cost-effectiveness of this approach has been questioned(5).

Currently, the standard of care for assessing BO and OVs is hospital-based conventional oesophagogastroduodenoscopy (C-OGD). This requires a fully equipped endoscopy department, complete with nursing support, recovery facilities, monitoring, and decontamination rooms(9). Patients frequently require conscious sedation(10). C-OGD can be perceived to be an uncomfortable experience for the patient which may prompt those eligible for screening not to attend(11,12). These features of C-OGD fail to meet screening principles of cost-effectiveness and acceptability.

To overcome this, various alternative screening tools have been proposed and remain largely the preserve of research studies. Portable and disposable transnasal endoscopy (TNE) is one such tool that has been proposed as a solution. The suggested benefits of TNE over C-OGD include allowing the patient to speak during the examination, increased comfort levels and avoidance of sedation. It has been shown to be both accurate and cost-effective as a potential screening tool(1,2,13,14).

1  
2  
3 The EG scan™ II system (Intromedic Ltd., Seoul, South Korea) is a transnasal  
4 endoscopic device with a disposable 6mm diameter probe. It has an air insufflation  
5 channel but no biopsy or irrigation port and is designed to be a method of visualising  
6 various upper gastrointestinal conditions (Figure 1). The apparatus has been designed  
7 for use in a consultation room, as a 'clinic-based' procedure, with potential for use in  
8 general practice.  
9  
10  
11  
12  
13  
14  
15  
16  
17  
18  
19  
20

21 The tolerability of TNE compared with that of C-OGD has been studied using visual  
22 scales and questionnaires in randomised trials, assessing attitudes towards and  
23 experience of sedated C-OGD and unsedated TNE(15). To date, we have no  
24 knowledge of any qualitative studies that have considered the acceptability of TNE to  
25 patients who have undergone both it and C-OGD in a controlled environment. The  
26 lived experiences of those who undergo these procedures can inform preference and  
27 identify the challenges or opportunities for healthcare systems.  
28  
29  
30  
31  
32  
33  
34  
35  
36  
37

38 Tolerability and preference scores like the visual analogue scale (VAS) and the  
39 Spielberg State Trait Anxiety Inventory (STAI-6) questionnaire are helpful ways of  
40 assessing the impressions of large populations of patients towards a healthcare  
41 experience(16,17). They do not however permit reflection, nuance and richer insights  
42 into the experiences of individuals and therefore do not inform service development in  
43 the same way that qualitative methods do.  
44  
45  
46  
47  
48  
49  
50  
51

52  
53 The aims of this study were to explore the expectations and experiences of patients  
54 who underwent both TNE in an outpatient setting and C-OGD on the same day through  
55 qualitative analysis, and to determine the factors that impact on the acceptability of  
56 these procedures.  
57  
58  
59  
60



## Methods

### Study Design and Setting

A qualitative methodology was employed, with the analysis of experiences and perceptions of both C-OGD and clinic-based TNE, using face-to-face interviews. This builds on wider research examining the technical feasibility, quality, safety, acceptability (through scoring measures) and accuracy of clinic-based TNE using the EG Scan compared to C-OGD as the reference standard(1). The procedure for endoscopic examination using the EG Scan™ is outlined in Figure 1 and Box 1. Whereas the original research was conducted in three different centres, the collection of information with respect to this qualitative study was done at one centre (Nottingham, UK) with all patients having undergone endoscopy at that location.

The East Midlands division of the Research Ethics Committee granted approval for the study (REC reference 12/EM/0100). It was prospectively registered (ISRCTN registry identifier: 70595405). Specific consent forms for these interviews were devised and confirmation of consent was sought during each interview. Interview transcripts have been stored on an encrypted secure drive at the study site.

#### Box 1. Use of the EG Scan probe for oesophageal visualisation

1. Patients given 100ml liquid drink comprising water, orange cordial flavouring, a mucolytic (10ml of 200mg/ml N-acetylcysteine) and an anti-foaming agent (1ml of Simeticone 40mg/ml) to improve mucosal visualisation
2. A topical aerosol spray (Lidocaine Hydrochloride 5% and Phenylephrine Hydrochloride 0.5% is applied to the nares (3-4 sprays), 3-5 minutes prior to the procedure
3. The probe is introduced into the right or left nare and advanced into the proximal oesophagus under direct vision
4. The oesophagus and gastro-oesophageal junction are inspected both in forward and retro-flexion views
5. Following the procedure the probe is disconnected from the hand-held controller and discarded

## Participants and Recruitment

Purposeful sampling took place, in which most of the individuals involved in the wider research project (47/50) were identified as potential participants before being contacted by telephone within four weeks of the day of endoscopy. Three distinct patient groups were identified: those with histologically confirmed BO, those warranting OV screening or surveillance, and those with dyspepsia referred for diagnostic endoscopy. At the time of their recruitment to the original study comparing clinic-based TNE with C-OGD, these individuals agreed to be contacted in the future to further explore their experiences of the procedure for the purposes of research, which would include interview at a site that maximised confidentiality and was agreeable to interviewer and participant. Those who could not tolerate both endoscopic examinations or who underwent variceal band ligation during C-OGD were excluded from recruitment to interview as their lived experiences were deemed to be considerably different from the rest.

It was anticipated that a minimum of twenty interviews would have to be conducted to gather sufficient information. This was informed in part by existing literature(18). By the 24<sup>th</sup> participant interview, it was determined that data saturation had been reached (as no new themes were being identified) and that no further participants would be required.

## Data Collection

The interviews were conducted with interviewers guided by a structured written interview schedule. Both interviewers were female registered research nurses independent of the main study team and blinded to the patients' tolerability scores.

1  
2  
3 The study was conducted and reported according to the COREQ standards for  
4 qualitative research(19).  
5  
6  
7

8  
9 The interview schedule included broad exploration of participants' prior understanding  
10 and expectations of undergoing both forms of endoscopy procedure, their experiences  
11 of the procedures and factors influencing this, and their recommendations for future  
12 service provision, including any information or support needs.  
13  
14  
15  
16

17  
18 Interviews were recorded on an encrypted device and all lasted less than one hour.  
19  
20 Following this, recordings were transcribed to Microsoft Word documents undertaken  
21 by a professional transcriber who ensured that the transcripts were anonymised.  
22  
23  
24  
25

## 26 27 **Data Analysis**

28  
29 Transcribed interviews underwent thematic analysis by one researcher (JM) who was  
30 not involved in the study beforehand but fully briefed of the processes. Transcripts  
31 were read at least twice with broad notes being made of possible themes(20). The  
32 transcripts were then entered into NVivo version 12 (QSR International, Melbourne,  
33 Australia) software for analytical support. This program helped to identify the  
34 frequency of language used, its relation to other statements and along with human  
35 interpretation, to determine the relevance of the language used to the research aims.  
36  
37  
38  
39  
40  
41  
42  
43  
44  
45  
46  
47  
48  
49  
50  
51  
52  
53  
54  
55  
56  
57  
58  
59  
60  
61  
62  
63  
64  
65  
66  
67  
68  
69  
70  
71  
72  
73  
74  
75  
76  
77  
78  
79  
80  
81  
82  
83  
84  
85  
86  
87  
88  
89  
90  
91  
92  
93  
94  
95  
96  
97  
98  
99  
100  
Themes were checked with the supporting text and interpretations drawn.

## 50 51 **Rigour**

52  
53 In order to ensure scientific rigour, checks were made at each stage of this study, while  
54 taking care not to compromise the unique contribution that good quantitative research  
55 can bring to scientific progress(21). As well as the sampling methods described above,  
56 we used existing theoretical frameworks to aid data collection and analysis. Our  
57  
58  
59  
60

1  
2  
3 transcripts were analysed for deviant cases, which were noted but acknowledged not  
4 to represent the majority of participants' experiences. Reflexivity was undertaken in  
5  
6 which researchers considered the impact they had on recruitment, responses and  
7  
8 analysis.  
9  
10  
11  
12

### 13 **Patient and Public Involvement**

14  
15  
16 Following TNE and C-OGD patients were asked to complete a questionnaire on their  
17 experiences of these tests. Analysis of the questionnaires and encounters between  
18 researchers and patients during this time strongly informed the preparation for semi-  
19 structured interviews, as part of the overall iterative process. In addition, throughout  
20 this process the input of the Patient and Public Involvement group at Nottingham  
21 Biomedical Research Centre was taken into consideration in terms of aims, design,  
22 patient consent and information leaflets. Details of the research study are to be made  
23 available to participants on request.  
24  
25  
26  
27  
28  
29  
30  
31  
32  
33  
34  
35  
36  
37  
38  
39  
40

### 41 **Results**

42  
43 Twenty-three interviews took place, with participants having BO (n=11), OV (n=8) or  
44 neither of these (those referred for investigation of dyspepsia) (n=4). Given the  
45 standard approach of the two endoscopic procedures, excluding those having had  
46 variceal band ligation, it was determined that all participants shared a similar lived  
47 experience and could all give accounts that can provide insights into the acceptability  
48 of TNE as a screening tool for either BO or OV. More details on the backgrounds of  
49 these 23 interview participants are outlined in Table 1.  
50  
51  
52  
53  
54  
55  
56  
57  
58  
59  
60

| Basic Demographics of Interview Participants                   |            |
|----------------------------------------------------------------|------------|
| Males (n/23)                                                   | 17         |
| Sedation for C-OGD (n/23)                                      | 13         |
| Median Age (range)                                             | 66 (48-83) |
| Barrett's Oesophagus (n/23)                                    | 11         |
| Liver Disease warranting Varices Screening/Surveillance (n/23) | 8          |
| Dyspepsia (n/23)                                               | 4          |

**Table 1.** Demographic and sedation details of 23 interview participants

Four dominant themes were identified after careful thematic analysis, using NVivo™ software. The four themes were: i) inclusivity in one's own health care; ii) comfort level and convenience; iii) validity of the procedure and application to a screening population; iv) a sense of altruism and reciprocity. The evidence supporting these four themes is outlined below, illustrated with excerpts from transcripts.

### **Inclusivity in one's own healthcare**

1  
2  
3 Every participant acknowledged that they had consented with appropriate knowledge  
4 of each procedure. The existence of established guidelines, best practice and trust in  
5 the decision-making of medical professionals prompted attendance for endoscopic  
6 tests, with one participant summarising the feelings of many others by saying *"If you've  
7 got to have a test, you've got to have a test."* Another participant said of C-OGD, *"I  
8 know it's part of the care, that you've got to have it done"*. The language used by them  
9 indicates a disinclination to undergo C-OGD, while they described TNE as  
10 *"empowering"*, *"fascinating"* and that they would *"definitely"* have it done again.  
11  
12 Participants used their knowledge of their chronic conditions and their symptoms as  
13 accompanying motives for having endoscopic tests. On attending for the dual  
14 endoscopic tests as part of a research study, most participants described feeling well-  
15 informed of the procedures and involved in the decision-making process. Two people  
16 expressed initial wariness of TNE as they did not know what to expect but felt  
17 reassured after a fuller explanation. In contrast, with the *"impersonal"* C-OGD where  
18 they felt *"trapped...claustrophobic"* or like in *"a production line"* most of the participants  
19 praised the level of empowerment and control they had with TNE where they could  
20 speak with the operator, sit up in a chair and view their endoscopic images if they  
21 wished.  
22  
23  
24  
25  
26  
27  
28  
29  
30  
31  
32  
33  
34  
35  
36  
37  
38  
39  
40  
41  
42  
43  
44  
45

### 46 **Comfort level and convenience**

47  
48  
49 As part of the original study, every participant completed visual analogue scales of  
50 their experiences of each endoscopic procedure. This was revisited at interview and  
51 affirmed that the majority preferred TNE to unsedated C-OGD. Among those having  
52 sedation for C-OGD, the preference for TNE remained but this was less strong. A  
53 sizeable number of individuals chose sedation following past experiences of  
54  
55  
56  
57  
58  
59  
60

1  
2  
3 undergoing C-OGD without. All TNEs were performed without sedation, which was  
4 reported as acceptable by all participants, who described minor nasal discomfort as  
5 the predominant uncomfortable element. They had insight that having an unsedated  
6 procedure would mean *“you can go straight home”* afterwards, making it more time-  
7 efficient and convenient. For those who had unsedated C-OGD, excessive gagging  
8 featured almost universally as well as a measure of distress that caused one patient  
9 to cry and another to state *“I wouldn’t recommend that to anyone.”*

### 20 **Validity of the procedure and application to a screening population**

21  
22  
23 The EG scan has been shown to have accuracy in the detection of BO and  
24 medium/large OVs(1,2). Participants were informed of the outcome of their own  
25 endoscopic examinations but were unaware of the study findings that TNE and C-  
26 OGD results were in concordance. Participants were however encouraged to use their  
27 lived experience to give an account of how important test accuracy would be to them  
28 and to others. The premise was that of TNE being extended to screening individuals  
29 in a community setting.

30  
31  
32 For those who had a history of undergoing C-OGDs for BO and OVs, the potential  
33 accuracy of TNE was important. They described C-OGD as a *‘necessary evil’* but an  
34 informative test for their condition which they have little choice but to undergo given  
35 the reasons above. While most acknowledged TNE as more comfortable, they  
36 suggested that it would only be an acceptable alternative if its ability to detect  
37 abnormalities matched that of C-OGD. Based on his experience one participant  
38 declared, *“I do believe the gastroscopy one is more thorough.”* Alongside this, the  
39 participants emphasised the requirement for adequately trained endoscopists to  
40 perform TNE and some expressed reservations over their general practitioners taking

1  
2  
3 up the role- “As long as you had proficient GPs doing it” “As long as he (GP) can do  
4 *it...properly.*” For this reason, opinion was divided on the location of the test, with  
5  
6 some preferring the specialist nature of secondary care and others espousing the  
7  
8 greater convenience and comfort of having TNE in the community.  
9  
10  
11  
12

### 13 **Sense of altruism and reciprocity**

14  
15  
16 Participants used their experiences as patients and as study participants to deliver  
17  
18 unique insights into how endoscopic screening would be received by the target  
19  
20 populations. For many patients, their positive experiences of healthcare informed their  
21  
22 decision-making in becoming a research participant. “*I was most grateful for what the*  
23  
24 *hospital had done for me previously*”, “*I ought to try and put something back in*” and  
25  
26 “*I’m always ready to help in the progress of science*” were some statements that clearly  
27  
28 showed the willingness of participants to use their experiences for the betterment of  
29  
30 others.  
31  
32  
33  
34  
35

36 The involvement of those who have undergone the procedure is an important factor in  
37  
38 establishing a screening programme. Participants suggested that prospective patients  
39  
40 would be reassured by engaging with someone who had already undergone the  
41  
42 procedure, reflecting the place of social constructionism in society’s view towards  
43  
44 healthcare screening in an overt fashion(22).  
45  
46  
47

### 48 **Discussion**

49  
50  
51 This research represents the first time that a qualitative study has been conducted into  
52  
53 the experiences of patients undergoing transnasal endoscopy. The additional  
54  
55 information derived from a qualitative as compared to a quantitative means of  
56  
57 assessing acceptability (eg VAS or structured questionnaire) allows for deeper  
58  
59  
60



1  
2  
3 interpretation of a patient's perspective. The themes identified in this study encourage  
4 the view that TNE could be acceptable to a screening population, thus fulfilling an  
5 important principle of a viable screening programme(23). To the participants, the  
6 notion of an accurate test that was superior in comfort and convenience was  
7 appealing. They could see the benefits that this could bring a wider population and  
8 were pleased to be part of a community that could enhance other patients'  
9 experiences. The greater mutualism and control that TNE seems to bring in contrast  
10 to C-OGD made it more appealing, which could be important in achieving adequate  
11 uptake of in a screening population. Questions for the use of TNE as a screening tool  
12 remain. The inability of the EG Scan system to allow biopsies is one recurring concern  
13 for participants, and nasal discomfort is a significant drawback. There is evidence for  
14 higher comfort levels during endoscopy when thinner endoscopes (6 mm or less in  
15 diameter) are used, whether transnasally or transorally(24).

16  
17  
18  
19  
20  
21  
22  
23  
24  
25  
26  
27  
28  
29  
30  
31  
32  
33  
34 Contradicting views emergent from the data also provide important insights. The  
35 minority of participants who did not wish to view endoscopic images, those who would  
36 prefer C-OGD as a screening tool because of its established nature and individuals  
37 who would prefer to attend hospital for TNE rather than the community, all had valid  
38 reasons that warrant consideration. The participants realised that, as individuals who  
39 had pre-existing conditions or symptoms requiring OGD examination, they differed  
40 from a screening population, making direct comparisons impossible. Some of the  
41 reasons given for preferring aspects of C-OGD over TNE are indeed based in existing  
42 practices e.g. oesophageal biopsies in BO using C-OGD.

43  
44  
45  
46  
47  
48  
49  
50  
51  
52  
53  
54  
55  
56 Patient acceptability has been studied through qualitative means in related areas of  
57 gastrointestinal practice. The Cytosponge TFF-3 test is a means of diagnosing BO  
58  
59  
60

1  
2  
3 through non-endoscopic means. A study using semi-structured interviews and focus  
4 groups analysed responses from Cytosponge-naïve but eligible patients to gauge their  
5 impression of this test versus endoscopy, using videos and explanation of the clinical  
6 problem by a researcher(25). Qualitative research of patients undergoing C-OGD for  
7 BO reflect themes of comfort and control being important to them, which aligns well  
8 with our findings(26). Additionally, qualitative analysis of interviews has been  
9 conducted to gain an insight into factors affecting adherence to endoscopic screening,  
10 which would be a major factor in establishing an effective service(27).  
11  
12  
13  
14  
15  
16  
17  
18  
19  
20  
21

## 22 **Conclusions**

23  
24  
25  
26 The information collected in this patient-centred qualitative study has identified four  
27 main themes underlying the expectations and experiences of those undergoing TNE  
28 and C-OGD. They are inclusivity in one's own health care, comfort level and  
29 convenience, validity of the procedure and application to a screening population, and  
30 a sense of altruism and reciprocity. We believe that this analysis is a reliable  
31 reflection of the experiences of the patients involved and that it provides insights into  
32 the opportunities and challenges for interventions offered to patients selected as 'at  
33 risk' and therefore considered for screening. The themes align with quantitative  
34 acceptability outcomes and are likely to reflect the experiences of at-risk screening  
35 populations within the wider community.  
36  
37  
38  
39  
40  
41  
42  
43  
44  
45  
46  
47  
48

## 49 **Author Contributions**

50  
51 John J. McGoran: contributed to analysis, interpretation of data and drafted the  
52 manuscript.  
53

54  
55 Andrea Bennett: contributed to the acquisition of data and critical revision of the  
56 manuscript for important intellectual content.  
57  
58  
59  
60

1  
2  
3 Joanne Cooper: contributed to acquisition of data, interpretation of data and critical  
4  
5 revision of the manuscript for important intellectual content.  
6

7  
8 John de Caestecker: contributed to the study supervision, interpretation of data and  
9  
10 critical revision of the manuscript for important intellectual content.  
11

12  
13 Laurence B. Lovat: contributed to the study supervision, interpretation of data and  
14  
15 critical revision of the manuscript for important intellectual content.  
16

17  
18 Indra Neil Guha: contributed to the acquisition of data, study supervision,  
19  
20 interpretation of data and critical revision of the manuscript for important intellectual  
21  
22 content.  
23

24  
25 Krish Ragunath: contributed to the conception, design and supervision of the study,  
26  
27 acquisition of data, study supervision, interpretation of data and critical revision of  
28  
29 the manuscript for important intellectual content.  
30

31  
32 Sarmed S. Sami: contributed to the conception, design and supervision of the study,  
33  
34 acquisition of data; analysis; interpretation of data; and critical revision of the  
35  
36 manuscript for important intellectual content.  
37

### 38 **Potential Conflicts of Interest**

39  
40 Dr. S. S. Sami was funded by an Olympus-Core National Endoscopy Research  
41  
42 Fellowship grant, Core Charity, United Kingdom (grant number: RB4803). This study  
43  
44 was part funded by a grant from Intromedic Ltd, Seoul, South Korea.  
45

46  
47 Professor Krish Ragunath is a research grant recipient from Intromedic Ltd, Seoul,  
48  
49 South Korea.  
50

51  
52 The other authors have no conflicts of interest to declare relevant to this publication.  
53  
54  
55  
56  
57  
58  
59  
60

1  
2  
3  
4  
5  
6  
7  
8  
9  
10  
11  
12  
13  
14  
15  
16  
17  
18  
19  
20  
21  
22  
23  
24  
25  
26  
27  
28  
29  
30  
31  
32  
33  
34  
35  
36  
37  
38  
39  
40  
41  
42  
43  
44  
45  
46  
47  
48  
49  
50  
51  
52  
53  
54  
55  
56  
57  
58  
59  
60

For peer review only

## References

1. Sami SS, Iyer PG, Pophali P, Halland M, di Pietro M, Ortiz-Fernandez-Sordo J, et al. Acceptability, Accuracy, and Safety of Disposable Transnasal Capsule Endoscopy for Barrett's Esophagus Screening. *Clin Gastroenterol Hepatol* 2018
2. Sami SS, Ragunath K, Wilkes EA, James M, Mansilla-Vivar R, Ortiz-Fernández-Sordo J, et al. The detection of oesophageal varices using a novel, disposable, probe-based transnasal endoscope: a prospective diagnostic pilot study. *Liver Int.*

- 1  
2  
3 2016;36(11):1639–48.  
4  
5 3. Shaheen NJ, Falk GW, Iyer PG. ACG Clinical Guideline : Diagnosis and Management  
6 of Barrett ' s Esophagus. 2015;(March):1–21.  
7  
8  
9 4. Garcia-tsoo G, Abrales JG, Berzigotti A, Bosch J. Portal Hypertensive Bleeding in  
10 Cirrhosis : Risk Stratification , Diagnosis , and Management : 2016 Practice Guidance  
11 by the American Association for the Study of Liver Diseases A . Purpose and Scope.  
12 Hepatology. 2017;65(1):310–35.  
13  
14  
15 5. Tripathi D, Stanley AJ, Hayes PC, Patch D, Millson C, Mehrzad H, et al. UK  
16 guidelines on the management of variceal haemorrhage in cirrhotic patients. Gut.  
17 2015;64(11):1680–704.  
18  
19  
20 6. Fitzgerald RC, Di Pietro M, Raganath K, Ang Y, Kang JY, Watson P, et al. British  
21 Society of Gastroenterology guidelines on the diagnosis and management of Barrett's  
22 oesophagus. Gut. 2014;63(1):7–42.  
23  
24  
25 7. Hayeck TJ, Kong CY, Spechler SJ, Scott Gazelle G, Hur C. The Prevalence of  
26 Barrett's Esophagus in the US: Estimates from a Simulation Model Confirmed by  
27 SEER Data. Dis. Esophagus 2010;23(6):451-457  
28  
29  
30 8. Thomopoulos K, Theocharis G, Mimidis K, Lampropoulou-Karatzas C, Alexandridis E,  
31 Nikolopoulou V. Improved survival of patients presenting with acute variceal bleeding  
32 Prognostic indicators of short-and long-term mortality. Dig. Liv. Dis. 2006;38:899-904  
33  
34  
35 9. Dunkley I, Griffiths H, Follows R, Ball A, Collins M, Dodds P, et al. UK consensus on  
36 non-medical staffing required to deliver safe, quality-assured care for adult patients  
37 undergoing gastrointestinal endoscopy. Frontline Gastroenterol 2018;0:1-11  
38  
39  
40 10. Cohen LB, Delegge MH, Aisenberg J, Brill J V, Inadomi JM, Kochman ML, et al. AGA  
41 Institute Review of Endoscopic Sedation. Gastroenterol. 2007;133:675-701  
42  
43  
44 11. Kruijshaar ME, Kerkhof M, Siersema PD, Steyerberg EW, Homs MY V, Essink-Bot M-  
45 L, et al. The burden of upper gastrointestinal endoscopy in patients with Barrett's  
46 esophagus. Endoscopy. 2006;38(09):873–8.  
47  
48  
49 12. Beg S, Raganath K, Wyman A, Banks M, Trudgill N, Pritchard MD, et al. Quality  
50  
51  
52  
53  
54  
55  
56  
57  
58  
59  
60

- standards in upper gastrointestinal endoscopy: A position statement of the British Society of Gastroenterology (BSG) and Association of Upper Gastrointestinal Surgeons of Great Britain and Ireland (AUGIS). *Gut*. 2017;66(11):1886–99.
13. Aedo MR, Zavala-González MÁ, Meixueiro-Daza A, María J, María R-T, Aedo R. Accuracy of transnasal endoscopy with a disposable esophagoscope compared to conventional endoscopy. *World J Gastrointest Endosc* 2014;6(4):128-136
  14. Honing J, Kievit W, Bookelaar J, Peters Y, Iyer PG, Siersema PD. Endosheath ultrathin transnasal endoscopy is a cost-effective method for screening for Barrett's esophagus in patients with GERD symptoms. *Gastrointest Endosc* 2018
  15. Blevins CH, Egginton JS, Shah ND, Johnson ML, Iyer PG. Comparative Assessment of Patient Preferences and Tolerability in Barrett Esophagus Screening: Results From a Randomized Trial. *J Clin Gastroenterol*. 2018;52(10).
  16. Likert R. A Technique for the Measurement of Attitudes. *Archives of Psychology* 1932;22(140):55
  17. Marteau T, Bekker H. The development of a six-item short-form of the state scale of the Spielberger State-Trait Anxiety Inventory (STAI). *Br J Clin Psychol*. 1992;31(Part 3):301–6.
  18. Guest G, Bunce A, Johnson L. How Many Interviews Are Enough?: An Experiment with Data Saturation and Variability. *Field methods*. 2006;18(1):59–82.
  19. Tong A, Sainsbury P, Craig J. Consolidated criteria for reporting qualitative research (COREQ): a 32-item checklist for interviews and focus groups. *Int J Qual Heal care*. 2007;19(6):349–57.
  20. Braun V, Clarke V, Terry G. Thematic analysis. *Qual Res Clin Heal Psychol*. 2014;24:95–114.
  21. Barbour RS. Checklists for improving rigour in qualitative research: a case of the tail wagging the dog? *BMJ*. 2001;322(7294):1115.
  22. Calvo A, McCormack Brown K, McDermott RJ, Bryant CA, Coreil J, Loseke D. Social Construction of Cervical Cancer Screening among Panamanian Women. *Am J Heal*

- 1  
2  
3 Educ 2012 May;43(3):153–63.  
4  
5 23. Wilson JMG, Jungner G. Principles and Practice of Screening for Disease. World  
6 Health Organization 1968.  
7  
8  
9 24. Lin L-F, Ma K-Z, Tu H-L. A prospective randomized study comparing transnasal and  
10 peroral 5-mm ultrathin endoscopy. J Formos Med Assoc 2014;113:371–6.  
11  
12  
13 25. Freeman M, Offman J, Walter FM, Sasieni P, Smith SG. Acceptability of the  
14 Cytosponge procedure for detecting Barrett's oesophagus: A qualitative study. BMJ  
15 Open. 2017;7(3):1–8.  
16  
17  
18 26. Arney J, Hinojosa-Lindsey M, Street RL, Hou J, El-Serag HB, Naik AD. Patient  
19 Experiences with Surveillance Endoscopy: A Qualitative Study. Dig Dis Sci 2014  
20 Jul;59(7):1378–85.  
21  
22  
23 27. Sly JR, Edwards T, Shelton RC, Jandorf L. Identifying Barriers to Colonoscopy  
24 Screening for Nonadherent African American Participants in a Patient Navigation  
25 Intervention. Heal Educ Behav 2012 Oct 19;40(4):449–57.  
26  
27  
28  
29  
30  
31  
32  
33  
34  
35  
36  
37  
38  
39  
40  
41  
42  
43  
44  
45  
46  
47  
48  
49  
50  
51  
52  
53  
54  
55  
56  
57  
58  
59  
60

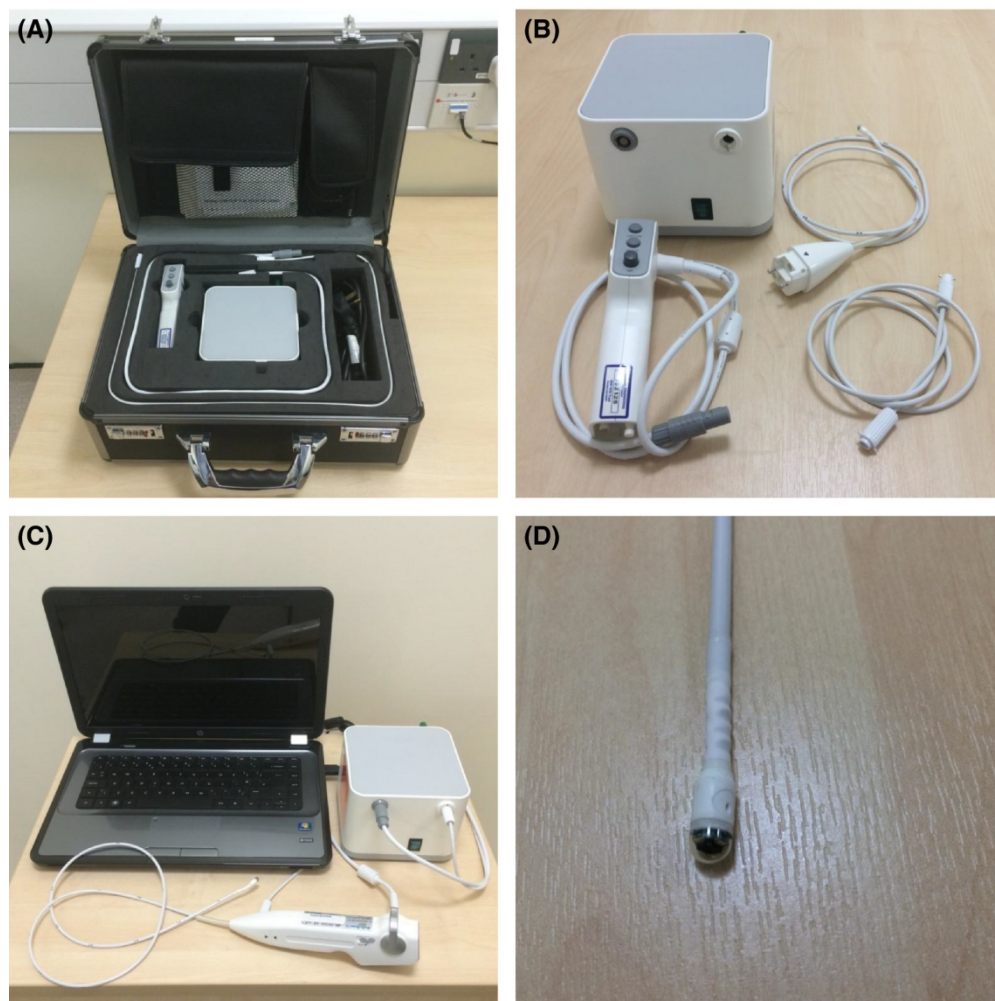

Figure 1. The EG ScanTM II system. (A) the portable case with four main parts; (B) the image processor (top left), disposable probe (top right), air tube (bottom right) and hand-held controller (bottom left); (C) the system connected and ready for use; (D) close view of the capsule probe tip. (Reproduced with permission from Sami SS, et al. Copyright John Wiley and Sons).



## COREQ (CONsolidated criteria for REporting Qualitative research) Checklist

A checklist of items that should be included in reports of qualitative research. You must report the page number in your manuscript where you consider each of the items listed in this checklist. If you have not included this information, either revise your manuscript accordingly before submitting or note N/A.

| Topic                                          | Item No. | Guide Questions/Description                                                                                                                              | Reported on Page No. |
|------------------------------------------------|----------|----------------------------------------------------------------------------------------------------------------------------------------------------------|----------------------|
| <b>Domain 1: Research team and reflexivity</b> |          |                                                                                                                                                          |                      |
| <i>Personal characteristics</i>                |          |                                                                                                                                                          |                      |
| Interviewer/facilitator                        | 1        | Which author/s conducted the interview or focus group?                                                                                                   |                      |
| Credentials                                    | 2        | What were the researcher's credentials? E.g. PhD, MD                                                                                                     |                      |
| Occupation                                     | 3        | What was their occupation at the time of the study?                                                                                                      |                      |
| Gender                                         | 4        | Was the researcher male or female?                                                                                                                       |                      |
| Experience and training                        | 5        | What experience or training did the researcher have?                                                                                                     |                      |
| <i>Relationship with participants</i>          |          |                                                                                                                                                          |                      |
| Relationship established                       | 6        | Was a relationship established prior to study commencement?                                                                                              |                      |
| Participant knowledge of the interviewer       | 7        | What did the participants know about the researcher? e.g. personal goals, reasons for doing the research                                                 |                      |
| Interviewer characteristics                    | 8        | What characteristics were reported about the interviewer/facilitator? e.g. Bias, assumptions, reasons and interests in the research topic                |                      |
| <b>Domain 2: Study design</b>                  |          |                                                                                                                                                          |                      |
| <i>Theoretical framework</i>                   |          |                                                                                                                                                          |                      |
| Methodological orientation and Theory          | 9        | What methodological orientation was stated to underpin the study? e.g. grounded theory, discourse analysis, ethnography, phenomenology, content analysis |                      |
| <i>Participant selection</i>                   |          |                                                                                                                                                          |                      |
| Sampling                                       | 10       | How were participants selected? e.g. purposive, convenience, consecutive, snowball                                                                       |                      |
| Method of approach                             | 11       | How were participants approached? e.g. face-to-face, telephone, mail, email                                                                              |                      |
| Sample size                                    | 12       | How many participants were in the study?                                                                                                                 |                      |
| Non-participation                              | 13       | How many people refused to participate or dropped out? Reasons?                                                                                          |                      |
| <i>Setting</i>                                 |          |                                                                                                                                                          |                      |
| Setting of data collection                     | 14       | Where was the data collected? e.g. home, clinic, workplace                                                                                               |                      |
| Presence of non-participants                   | 15       | Was anyone else present besides the participants and researchers?                                                                                        |                      |
| Description of sample                          | 16       | What are the important characteristics of the sample? e.g. demographic data, date                                                                        |                      |
| <i>Data collection</i>                         |          |                                                                                                                                                          |                      |
| Interview guide                                | 17       | Were questions, prompts, guides provided by the authors? Was it pilot tested?                                                                            |                      |
| Repeat interviews                              | 18       | Were repeat interviews carried out? If yes, how many?                                                                                                    |                      |
| Audio/visual recording                         | 19       | Did the research use audio or visual recording to collect the data?                                                                                      |                      |
| Field notes                                    | 20       | Were field notes made during and/or after the interview or focus group?                                                                                  |                      |
| Duration                                       | 21       | What was the duration of the interviews or focus group?                                                                                                  |                      |
| Data saturation                                | 22       | Was data saturation discussed?                                                                                                                           |                      |
| Transcripts returned                           | 23       | Were transcripts returned to participants for comment and/or                                                                                             |                      |

| Topic                                  | Item No. | Guide Questions/Description                                                                                                        | Reported on Page No. |
|----------------------------------------|----------|------------------------------------------------------------------------------------------------------------------------------------|----------------------|
|                                        |          | correction?                                                                                                                        |                      |
| <b>Domain 3: analysis and findings</b> |          |                                                                                                                                    |                      |
| <i>Data analysis</i>                   |          |                                                                                                                                    |                      |
| Number of data coders                  | 24       | How many data coders coded the data?                                                                                               |                      |
| Description of the coding tree         | 25       | Did authors provide a description of the coding tree?                                                                              |                      |
| Derivation of themes                   | 26       | Were themes identified in advance or derived from the data?                                                                        |                      |
| Software                               | 27       | What software, if applicable, was used to manage the data?                                                                         |                      |
| Participant checking                   | 28       | Did participants provide feedback on the findings?                                                                                 |                      |
| <i>Reporting</i>                       |          |                                                                                                                                    |                      |
| Quotations presented                   | 29       | Were participant quotations presented to illustrate the themes/findings?<br>Was each quotation identified? e.g. participant number |                      |
| Data and findings consistent           | 30       | Was there consistency between the data presented and the findings?                                                                 |                      |
| Clarity of major themes                | 31       | Were major themes clearly presented in the findings?                                                                               |                      |
| Clarity of minor themes                | 32       | Is there a description of diverse cases or discussion of minor themes?                                                             |                      |

Developed from: Tong A, Sainsbury P, Craig J. Consolidated criteria for reporting qualitative research (COREQ): a 32-item checklist for interviews and focus groups. *International Journal for Quality in Health Care*. 2007. Volume 19, Number 6: pp. 349 – 357

**Once you have completed this checklist, please save a copy and upload it as part of your submission. DO NOT include this checklist as part of the main manuscript document. It must be uploaded as a separate file.**

# BMJ Open

## Acceptability to patients of screening disposable transnasal endoscopy: qualitative interview analysis

|                                 |                                                                                                                                                                                                                                                                                                                                                                                                                                                                                                                                                                                          |
|---------------------------------|------------------------------------------------------------------------------------------------------------------------------------------------------------------------------------------------------------------------------------------------------------------------------------------------------------------------------------------------------------------------------------------------------------------------------------------------------------------------------------------------------------------------------------------------------------------------------------------|
| Journal:                        | <i>BMJ Open</i>                                                                                                                                                                                                                                                                                                                                                                                                                                                                                                                                                                          |
| Manuscript ID                   | bmjopen-2019-030467.R1                                                                                                                                                                                                                                                                                                                                                                                                                                                                                                                                                                   |
| Article Type:                   | Original research                                                                                                                                                                                                                                                                                                                                                                                                                                                                                                                                                                        |
| Date Submitted by the Author:   | 23-Jul-2019                                                                                                                                                                                                                                                                                                                                                                                                                                                                                                                                                                              |
| Complete List of Authors:       | McGoran, John; University Hospitals of Leicester NHS Trust, Bennett, Andrea; Nottingham University Hospitals NHS Trust<br>Cooper, Joanne; Nottingham University Hospitals NHS Trust, Corporate<br>De Caestecker, John; University Hospitals of Leicester NHS Trust<br>Lovat, Laurence; University College London, Division of Surgery and<br>Interventional Science<br>Guha, Neil; Nottingham University Hospitals NHS Trust<br>Ragunath, Krish; Nottingham University Hospitals NHS Trust<br>Sami, Sarmed; University College London, Division of Surgery and<br>Interventional Science |
| <b>Primary Subject Heading</b>: | Gastroenterology and hepatology                                                                                                                                                                                                                                                                                                                                                                                                                                                                                                                                                          |
| Secondary Subject Heading:      | Evidence based practice, Health policy, Patient-centred medicine                                                                                                                                                                                                                                                                                                                                                                                                                                                                                                                         |
| Keywords:                       | Endoscopy < GASTROENTEROLOGY, Oesophageal disease < GASTROENTEROLOGY, Hepatology < INTERNAL MEDICINE                                                                                                                                                                                                                                                                                                                                                                                                                                                                                     |
|                                 |                                                                                                                                                                                                                                                                                                                                                                                                                                                                                                                                                                                          |

SCHOLARONE™  
Manuscripts

1  
2  
3  
4  
5 **Acceptability to patients of screening disposable transnasal**  
6  
7  
8 **endoscopy: qualitative interview analysis**  
9  
10

11  
12  
13 John J. McGoran<sup>1</sup>, Andrea Bennett<sup>2</sup>, Joanne Cooper<sup>2</sup>, John de Caestecker<sup>1</sup>, Laurence  
14  
15 B. Lovat<sup>3</sup>, Indra Neil Guha<sup>2</sup>, Krish Ragunath<sup>2</sup>, Sarmed S. Sami<sup>3</sup>  
16

17  
18 <sup>1</sup>Digestive Diseases Centre, University Hospitals of Leicester NHS Trust, UK  
19

20  
21 <sup>2</sup>National Institute for Health Research (NIHR) Biomedical Research Center in  
22  
23 Gastrointestinal and Liver Diseases at Nottingham University Hospitals NHS Trust and  
24  
25 the University of Nottingham, Queens Medical Center Campus, Nottingham, UK.  
26

27  
28 <sup>3</sup>Division of Surgery and Interventional Science, University College London, London,  
29  
30 UK.  
31

32  
33  
34  
35  
36  
37  
38 Correspondence to: John J McGoran [jmcgoran01@qub.ac.uk](mailto:jmcgoran01@qub.ac.uk)  
39  
40  
41  
42  
43  
44  
45  
46  
47

48 Short Title: Transnasal endoscopy: Qualitative analysis  
49

50 Word Count (excluding references and figures/tables): 4098  
51  
52  
53  
54  
55  
56  
57  
58  
59  
60

## Abstract

### Objectives

Screening in selected at-risk populations for Barrett's oesophagus (BO) and oesophageal varices (OVs) has been proposed, but there are obstacles with conventional oesophagogastroduodenoscopy (C-OGD), including patient acceptability. Portable and disposable office-based transnasal endoscopy (TNE) is a feasible and accurate alternative to C-OGD that may have use in primary and secondary care. This article outlines a qualitative analysis of patient experiences of TNE and C-OGD in order to gain an insight into an acceptable delivery of an endoscopic screening service.

### Design

Purposeful sampling identified 23 participants who then underwent semi-structured interviews to determine their experiences of both procedures. Thematic analysis was conducted to derive meaning from their lived experiences.

### Setting

A secondary care endoscopy unit, clinic room and interview room.

### Participants

Patients referred for BO or OV surveillance and for endoscopy to investigate dyspepsia underwent unsedated TNE using the EG Scan II device followed by C-OGD with or without sedation, as part of a clinical trial.

### Results

The themes that arose from our analysis were: inclusivity in one's own health care; comfort level and convenience; validity of the procedure and application to a screening population; and a sense of altruism and reciprocity.

1  
2  
3 Positive aspects of TNE included participant empowerment, reduced discomfort and  
4 avoidance of conscious sedation. Participants felt that if TNE screening was of proven  
5 efficacy it would be welcomed, though views on use in a community setting were  
6 mixed.  
7  
8  
9  
10  
11

## 12 **Conclusions**

13  
14 Most patients preferred TNE to unsedated C-OGD and the reasons they gave featured  
15 strongly in the emerging themes. This information identifies opportunities and  
16 challenges in establishing an endoscopic screening service.  
17  
18  
19  
20  
21  
22  
23  
24  
25  
26  
27

28 Keywords: endoscopy, oesophageal disease, hepatology  
29  
30  
31

## 32 **Strengths and Limitations of the study**

- 33  
34  
35  
36  
37  
38  
39  
40  
41  
42  
43  
44  
45  
46  
47  
48  
49  
50  
51  
52  
53  
54  
55  
56  
57  
58  
59  
60
- The size of the original study, in which 100 patients from this centre alone allowed for a broad stated aim and collection of participants until data saturation was reached.
  - Every participant had clinic-based TNE before C-OGD so their experiences of the TNE would reflect that of a person undergoing screening more so than if C-OGD was done first.
  - The advantage in performing thematic analysis on this group of patients is that it allowed us to develop clear themes with supporting data, which could allow transferability to other potential screening populations. It is highly likely the same themes would have been derived from interviews of participants from any

1  
2  
3 of the study centres and the conclusions could apply to many locations or  
4  
5 healthcare systems.  
6

- 7
- 8 • Qualitative research can be prone to claims of poor scientific rigour; however,  
9  
10 the framework by which the validity and reliability of a study is evaluated is  
11  
12 subject to standard quantitative criteria. To maximise the credibility and  
13  
14 dependability of the findings, reflexivity, in which the impact of the researcher  
15  
16 and social environment on each other is acknowledged and managed, was  
17  
18 employed at each stage. Care was taken not to manipulate participants into  
19  
20 giving accounts that favoured or condemned either endoscopic test.  
21  
22
  - 23 • The index of transferability for the findings within this study to non-research  
24  
25 settings and for other screening modalities and investigations is limited.  
26  
27  
28  
29  
30  
31  
32  
33  
34  
35  
36  
37  
38  
39  
40  
41  
42  
43  
44  
45  
46  
47  
48  
49  
50  
51  
52  
53  
54  
55  
56  
57  
58  
59  
60

## Introduction

Portable and disposable office-based transnasal endoscopy (TNE) is a feasible and accurate alternative to conventional oesophagogastroduodenoscopy (C-OGD) that may have use in primary and secondary care(1,2). Several authorities have highlighted the need to identify alternative, minimally-invasive screening tests for Barrett's oesophagus (BO) and oesophageal varices (OV) which are precursor conditions for oesophageal adenocarcinoma (OAC) and variceal bleeding, respectively(3–6). The incidence and mortality from OAC have risen rapidly over the last few decades(7). This has prompted efforts to screen at risk patients who are white, male, age 55 or over, with chronic reflux symptoms for BO(6). Similarly, incidence and mortality from chronic liver disease is also rising, with one of the major contributors being variceal haemorrhage(8). It is recommended practice to screen for varices using endoscopy in all patients with cirrhosis but the cost-effectiveness of this approach has been questioned(5).

Currently, the standard of care for assessing BO and OVs is hospital-based conventional oesophagogastroduodenoscopy (C-OGD). This requires a fully equipped endoscopy department, complete with nursing support, recovery facilities, monitoring, and decontamination rooms(9). Patients frequently require conscious sedation(10). C-OGD can be perceived to be an uncomfortable experience for the patient which may prompt those eligible for screening not to attend(11,12). These features of C-OGD fail to meet screening principles of cost-effectiveness and acceptability.

To overcome this, various alternative screening tools for high risk groups have been proposed and remain largely the preserve of research studies. Portable and disposable transnasal endoscopy (TNE) as a method of screening for BO and OVs is



1  
2  
3 one such tool that has been proposed as a solution. The suggested benefits of TNE  
4 over C-OGD include allowing the patient to speak during the examination, increased  
5 comfort levels and avoidance of sedation. It has been shown to be both accurate and  
6  
7  
8  
9  
10 cost-effective as a potential screening tool(1,2,13,14). The EG scan™ II system  
11  
12 (Intromedic Ltd., Seoul, South Korea) is a transnasal endoscopic device with a  
13  
14 disposable 6mm diameter probe. It has an air insufflation channel but no biopsy or  
15  
16 irrigation port and is designed to be a method of visualising various upper  
17  
18 gastrointestinal conditions (Figure 1). The apparatus has been designed for use in a  
19  
20 consultation room, as a 'clinic-based' procedure, with potential for use in general  
21  
22  
23  
24  
25  
26  
27  
28  
29  
30  
31  
32  
33  
34  
35  
36  
37  
38  
39  
40  
41  
42  
43  
44  
45  
46  
47  
48  
49  
50  
51  
52  
53  
54  
55  
56  
57  
58  
59  
60  
practice.

The tolerability regarding comfort levels of TNE compared with that of C-OGD has  
been studied using visual scales and questionnaires in randomised trials, assessing  
attitudes towards and experience of sedated C-OGD and unsedated TNE that allow a  
simple measure of preference between the two(15). Acceptability is a deeper concept,  
that takes into consideration not only comfort scores but the global patient experience  
and willingness to undergo the intervention. It may act as an indicator of patient uptake  
and inform strategies for recruitment on a population level. To date, we have no  
knowledge of any qualitative studies that have considered the acceptability of TNE to  
patients who have undergone both it and C-OGD in a controlled environment. The  
lived experiences of those who undergo these procedures can inform preference and  
identify the challenges or opportunities for healthcare systems.

Tolerability and preference scores like the visual analogue scale (VAS) and the  
Spielberger State Trait Anxiety Inventory (STAI-6) questionnaire are helpful ways of  
assessing the impressions of large populations of patients towards a healthcare

1  
2  
3 experience(16,17). They do not however permit reflection, nuance and richer insights  
4  
5 into the experiences of individuals and therefore do not inform service development in  
6  
7 the same way that qualitative methods do. A deeper analysis of this could add to the  
8  
9 clinical community's understanding of patients' sense-making process and enhance  
10  
11 human factors in screening or surveillance such as recruitment and retention.  
12  
13

14  
15 The aims of this study were to explore the expectations and experiences of patients  
16  
17 who underwent both TNE in an outpatient setting and C-OGD on the same day through  
18  
19 qualitative analysis, and to determine the factors that impact on the acceptability of  
20  
21 TNE as a potential screening and surveillance tool.  
22  
23

## 24 25 26 **Methods**

### 27 28 29 **Study Design and Setting**

30  
31 A qualitative methodology was employed, with the analysis of experiences and  
32  
33 perceptions of both C-OGD and clinic-based TNE, using face-to-face interviews. This  
34  
35 builds on wider research examining the technical feasibility, quality, safety,  
36  
37 acceptability (through scoring measures) and accuracy of clinic-based TNE using the  
38  
39 EG Scan compared to C-OGD as the reference standard(1). The procedure for  
40  
41 endoscopic examination using the EG Scan™ is outlined in Figure 1 and Box 1.  
42  
43 Whereas the original research was conducted in three different centres, the collection  
44  
45 of information with respect to this qualitative study was done at one centre  
46  
47 (Nottingham, UK) with all patients having undergone endoscopy at that location.  
48  
49  
50  
51

52  
53 The East Midlands division of the Research Ethics Committee granted approval for  
54  
55 the study (REC reference 12/EM/0100). It was prospectively registered (ISRCTN  
56  
57 registry identifier: 70595405). Specific consent forms for these interviews were  
58  
59  
60

1  
2  
3 devised and confirmation of consent was sought during each interview. Interview  
4  
5 transcripts have been stored on an encrypted secure drive at the study site.  
6  
7  
8  
9  
10  
11  
12

#### 13 Box 1. Use of the EG Scan probe for oesophageal visualisation

- 14  
15 1. Patients given 100ml liquid drink comprising water, orange cordial flavouring,  
16 a mucolytic (10ml of 200mg/ml N-acetylcysteine) and an anti-foaming agent  
17 (1ml of Simeticone 40mg/ml) to improve mucosal visualisation
- 18 2. A topical aerosol spray (Lidocaine Hydrochloride 5% and Phenylephrine  
19 Hydrochloride 0.5% is applied to the nares (3-4 sprays), 3-5 minutes prior to  
20 the procedure
- 21 3. The probe is introduced into the right or left nare and advanced into the  
22 proximal oesophagus under direct vision
- 23 4. The oesophagus and gastro-oesophageal junction are inspected both in  
24 forward and retro-flexion views
- 25 5. Following the procedure the probe is disconnected from the hand-held  
26 controller and discarded  
27  
28  
29  
30

### 31 32 33 **Participants and Recruitment**

34  
35 Purposeful sampling took place, in which most of the individuals in one centre involved  
36  
37 in the wider research project were identified as potential participants before being  
38  
39 contacted by telephone within four weeks of the day of endoscopy. This is a common  
40  
41 recruitment approach in qualitative research which contrasts with random sampling in  
42  
43 quantitative research that seeks to reduce selection bias. Three patient groups were  
44  
45 identified: those with histologically confirmed BO, those warranting OV screening or  
46  
47 surveillance, and those with dyspepsia referred for diagnostic endoscopy. The  
48  
49 experiences of all 47 patients were considered valid for an analysis of acceptability,  
50  
51 with three out of 50 ineligible because of ill health. Recruitment approaches for the  
52  
53 quantitative and qualitative studies were done in parallel, with individuals consenting  
54  
55 to involvement in an interview-based research study at a time following the day they  
56  
57  
58  
59  
60

1  
2  
3 underwent endoscopic examination. Those who could not tolerate both endoscopic  
4  
5 examinations or who underwent variceal band ligation during C-OGD were excluded  
6  
7 from recruitment to interview as their lived experiences were deemed to be  
8  
9 considerably different from the rest.  
10  
11

12  
13 It was anticipated that a minimum of twenty interviews would have to be conducted to  
14  
15 gather sufficient information. This was informed in part by existing literature(18). By  
16  
17 the 23rd participant interview, it was posed that data saturation had been reached and  
18  
19 no further participants would be required. This conclusion was supported following  
20  
21 thematic analysis of the existing interview transcripts and it was agreed by the  
22  
23 research team that further significant insights were unlikely to be gained from  
24  
25 additional interviews.  
26  
27  
28  
29

### 30 **Data Collection**

31  
32  
33 The interviews were conducted with interviewers guided by a topic schedule, that was  
34  
35 agreed by consensus of the researchers. The scheduled questions related to the  
36  
37 consenting process, the experiences of each endoscopic procedure and views over  
38  
39 the use of TNE in the community. The semi-structured nature of the interviews allowed  
40  
41 the skilled researchers to explore the given answers with further probing and  
42  
43 digression from the core topics. The topics and questions arose from the experiences  
44  
45 of the researcher as clinicians in caring for patients undergoing endoscopy and  
46  
47 knowledge of the processes of the original study where there was significant Patient  
48  
49 and Public Involvement. Both interviewers were female registered research nurses  
50  
51 independent of the main study team and blinded to the patients' tolerability scores.  
52  
53 The study was conducted and reported according to the COREQ standards for  
54  
55 qualitative research(19).  
56  
57  
58  
59  
60

1  
2  
3 The interview schedule included broad exploration of participants' prior understanding  
4 and expectations of undergoing both forms of endoscopy procedure, their experiences  
5 of the procedures and factors influencing this, and their recommendations for future  
6 service provision, including any information or support needs.  
7  
8  
9  
10

11  
12  
13 Interviews were recorded on an encrypted device and all lasted less than one hour.  
14  
15 Following this, recordings were transcribed to Microsoft Word documents undertaken  
16 by a professional transcriber who ensured that the transcripts were anonymised.  
17  
18  
19  
20

## 21 **Data Analysis**

22  
23  
24 Transcribed interviews underwent thematic analysis by one researcher (JM) who was  
25 not involved in the study beforehand but fully briefed of the processes. Transcripts  
26 were read at least twice with broad notes being made of recurrent words, phrases and  
27 sentiments from which possible themes could arise(20). The transcripts were then  
28 entered into NVivo version 12 (QSR International, Melbourne, Australia) software,  
29 which helped to identify the frequency of language used and its relation to other  
30 statements, to determine the relevance of the language used to the research aims.  
31  
32 These patterns were again considered by the researcher and the themes were arrived  
33 at. Themes were again checked with the supporting text and interpretations drawn.  
34  
35  
36  
37  
38  
39  
40  
41  
42  
43  
44  
45

## 46 **Rigour**

47  
48  
49 In order to ensure scientific rigour, checks were made at each stage of this study by  
50 primarily referring to the COREQ criteria, while taking care not to compromise the  
51 unique contribution that good quantitative research can bring to scientific  
52 progress(19)(21). The research team also discussed the analysis frequently, using  
53 existing theoretical frameworks to ensure competent data collection and analysis. Our  
54  
55  
56  
57  
58  
59  
60

1  
2  
3 transcripts were analysed for deviant cases, which were noted but acknowledged not  
4 to represent the majority of participants' experiences. Reflexivity was undertaken in  
5  
6 which researchers considered the impact they had on recruitment, responses and  
7  
8 analysis. Specifically, awareness of the VAS for comfort from the original study was  
9  
10 noted and care taken not to apply this to the qualitative analysis. The researchers are  
11  
12 aware of the requirements for a good screening tool so carefully considered that the  
13  
14 themes that arose did so from the participants' accounts and not from a predetermined  
15  
16 agenda. In considering all of the factors that might have affected the analysis a  
17  
18 reflexivity diary was kept until the conclusions were drawn upon.  
19  
20  
21  
22  
23  
24

### 25 **Patient and Public Involvement**

26  
27  
28 Following TNE and C-OGD patients were asked to complete a questionnaire on their  
29  
30 experiences of these tests. Analysis of the questionnaires and encounters between  
31  
32 researchers and patients during this time strongly informed the preparation for semi-  
33  
34 structured interviews. In addition, throughout this process the input of the Patient and  
35  
36 Public Involvement group at Nottingham Biomedical Research Centre was taken into  
37  
38 consideration in terms of aims, design, patient consent and information leaflets.  
39  
40  
41 Details of the research study are to be made available to participants on request.  
42  
43  
44  
45  
46  
47  
48

### 49 **Results**

50  
51  
52 Twenty-three interviews took place, with participants having BO (n=11), OV's (n=8) or  
53  
54 neither of these (those referred for investigation of dyspepsia) (n=4).(Table 1) Given  
55  
56 the standard approach of the two endoscopic procedures, excluding those having had  
57  
58 variceal band ligation, it was determined that all participants shared a similar lived  
59  
60

experience and could all give accounts that can provide insights into the acceptability of TNE as a screening tool for either BO or OVs. For the purposes of the thematic analysis it was therefore not thought necessary to divide the groups according to their indication for endoscopy. The majority (17/23) of participants were men, which somewhat represents the gender balance in those having endoscopic examination for BO and OVs. The presence of sedation for C-OGD was a factor in participants' lived experiences and this was taken into account during interview of each individual.

| Basic Demographics of Interview Participants                   |            |
|----------------------------------------------------------------|------------|
| Males (n/23)                                                   | 17         |
| Sedation for C-OGD (n/23)                                      | 13         |
| Median Age (range)                                             | 66 (48-83) |
| Barrett's Oesophagus (n/23)                                    | 11         |
| Liver Disease warranting Varices Screening/Surveillance (n/23) | 8          |
| Dyspepsia (n/23)                                               | 4          |

**Table 1.** Demographic and sedation details of 23 interview participants

Four dominant themes were identified after careful thematic analysis, using NVivo™ software. The four themes were: i) inclusivity in one's own health care; ii) comfort level and convenience; iii) validity of the procedure and application to a screening

1  
2  
3 population; iv) a sense of altruism and reciprocity. The evidence supporting these four  
4  
5 themes is outlined below, illustrated with excerpts from transcripts.  
6  
7

### 8 9 **Inclusivity in one's own healthcare**

10  
11  
12 Every participant acknowledged that they had consented with appropriate knowledge  
13  
14 of each procedure. The principle of autonomy was underlined in the response of  
15  
16 participants to a question of how involved they felt in the decision making process- "*I*  
17  
18 *could have said no. But I came looking for help.*", "*as a patient, I have the ultimate*  
19  
20 *say.*" The existence of established guidelines, best practice and trust in the decision-  
21  
22 making of medical professionals prompted attendance for endoscopic tests, with one  
23  
24 participant summarising the feelings of many others by saying "*If you've got to have a*  
25  
26 *test, you've got to have a test.*" Another participant said of C-OGD, "*I know it's part of*  
27  
28 *the care, that you've got to have it done*". The language used by them indicates a  
29  
30 disinclination to undergo C-OGD, while they described TNE as "*empowering*",  
31  
32 "*fascinating*" and that they would "*definitely*" have it done again. Participants used their  
33  
34 knowledge of their chronic conditions and their symptoms as accompanying motives  
35  
36 for having endoscopic tests. On attending for the dual endoscopic tests as part of a  
37  
38 research study, most participants described feeling well-informed of the procedures  
39  
40 and involved in the decision-making process. Two people expressed initial wariness  
41  
42 of TNE as they did not know what to expect but felt reassured after a fuller explanation.  
43  
44 In contrast, with the "*impersonal*" C-OGD where they felt "*trapped...claustrophobic*" or  
45  
46 like in "*a production line*" most of the participants praised the level of empowerment  
47  
48 and control they had with TNE where they could speak with the operator, sit up in a  
49  
50 chair and view their endoscopic images if they wished ("*I could watch it on the*  
51  
52 *monitor*").  
53  
54  
55  
56  
57  
58  
59  
60



### Comfort level and convenience

As part of the original study, every participant completed visual analogue scales of their experiences of each endoscopic procedure. This was revisited at interview and affirmed that the majority preferred TNE to unsedated C-OGD. Among those having sedation for C-OGD, the preference for TNE remained but this was less strong. A sizeable number of individuals chose sedation following past experiences of undergoing C-OGD without. All TNEs were performed without sedation, which was reported as acceptable by all participants, who described minor nasal discomfort as the predominant uncomfortable element. They had insight that having an unsedated procedure would mean *“you can go straight home”* afterwards, making it more time-efficient and convenient. For those who had unsedated C-OGD, excessive gagging featured almost universally as well as a measure of distress that caused one patient to cry and another to state *“I wouldn’t recommend that to anyone.”* Gagging was less of an issue for TNE as described by the individual who reported, *“not so much with the nasal one but with the, with the oral one, it was very bad gagging reflex.”*

### Validity of the procedure and application to a screening population

The EG scan has been shown to have accuracy in the detection of BO and medium/large OVs(1,2). Participants were informed of the outcome of their own endoscopic examinations but were unaware of the study findings that TNE and C-OGD results were in concordance. Participants were however encouraged to use their lived experience to give an account of how important test accuracy would be to them and to others. The premise was that of TNE being extended to screening individuals in a community setting.

1  
2  
3 For those who had a history of undergoing C-OGDs for BO and OV, the potential  
4 accuracy of TNE was important. They described C-OGD as a ‘*necessary evil*’ but an  
5 informative test for their condition which they have little choice but to undergo given  
6 the reasons above. Having been briefed on the devices, one participant recognised a  
7 possible limitation of the EG Scan probe- “*The nasal one, you can’t actually take*  
8 *biopsies from, you can’t use that to take samples.*” While most acknowledged TNE as  
9 more comfortable, they suggested that it would only be an acceptable alternative if its  
10 ability to detect abnormalities matched that of C-OGD. Based on his experience, (“*the*  
11 *day I had them both done, I think the nasal one, I think it missed something out*”) one  
12 participant declared, “*I do believe the gastroscopy one is more thorough.*” Alongside  
13 this, the participants emphasised the requirement for adequately trained endoscopists  
14 to perform TNE and some expressed reservations over their general practitioners  
15 taking up the role- “*As long as you had proficient GPs doing it*” “*As long as he (GP)*  
16 *can do it...properly.*” For this reason, opinion was divided on the location of the test,  
17 with some preferring the specialist nature of secondary care and others espousing the  
18 greater convenience and comfort of having TNE in the community.  
19  
20  
21  
22  
23  
24  
25  
26  
27  
28  
29  
30  
31  
32  
33  
34  
35  
36  
37  
38  
39  
40

### 41 **Sense of altruism and reciprocity**

42  
43  
44 Participants used their experiences as patients and as study participants to deliver  
45 unique insights into how endoscopic screening would be received by the target  
46 populations. For many patients, their positive experiences of healthcare informed their  
47 decision-making in becoming a research participant. “*I said yes because I was most*  
48 *grateful for what the hospital had done for me previously*”, “*I ought to try and put*  
49 *something back in*” and “*I’m always ready to help in the progress of science*” were  
50  
51  
52  
53  
54  
55  
56  
57  
58  
59  
60

1  
2  
3 some statements that clearly showed the willingness of participants to use their  
4 experiences for the betterment of others.  
5  
6

7  
8  
9 The involvement of those who have undergone the procedure is an important factor in  
10 establishing a screening programme. Participants suggested that prospective patients  
11 would be reassured by engaging with someone who had already undergone the  
12 procedure, reflecting the place of social constructionism in society's view towards  
13 healthcare screening in an overt fashion(22).  
14  
15  
16  
17  
18  
19

## 20 21 **Discussion**

22  
23  
24  
25 This research represents the first time that a qualitative study has been conducted into  
26 the experiences of patients undergoing transnasal endoscopy on this level. The  
27 interview participants' reflections on TNE were supported by the narrative of having  
28 had C-OGD on the same day but the aim of this research was not to contrast one  
29 endoscopic mode with the other, as each has its own applicability in clinical practice.  
30  
31  
32 The additional information derived from a qualitative as compared to a quantitative  
33 means of assessing acceptability (eg VAS or structured questionnaire) allows for  
34 deeper interpretation of a patient's perspective. The themes identified in this study  
35 encourage the view that TNE could be acceptable to a screening population, thus  
36 fulfilling an important principle of a viable screening programme(23).  
37  
38  
39  
40  
41  
42  
43  
44  
45  
46  
47

48  
49 The community of inquiry theory is a concept that unites the themes arrived at in this  
50 study (24). The background is that TNE is shown to be accurate and safe in the  
51 delivery of BO and OV assessment but the problem remains that not enough is deeply  
52 understood about its acceptability to a population. To explore the challenges and  
53 advantages offered by TNE in the screening of BO and OVs, participants from different  
54  
55  
56  
57  
58  
59  
60

1  
2  
3 backgrounds and for different reasons underwent the same procedure. Their individual  
4 perspectives were all considered and conclusions that reflect this community's  
5 account were arrived at, which will hopefully contribute to improved delivery of patient  
6 care. For the purposes of this study all of the accounts were communicated through  
7 the researchers but they are reflective of the conversations that may exist in the  
8 greater population.  
9

10  
11  
12 To the participants, the notion of an accurate test that was superior in comfort and  
13 convenience was appealing. They could see the benefits that this could bring a wider  
14 population and were pleased to be part of a community that could enhance other  
15 patients' experiences. The greater mutualism and control that TNE seems to bring in  
16 contrast to C-OGD made it more appealing, which could be important in achieving  
17 adequate uptake of in a screening population. It must of course be noted that the  
18 theme of 'inclusivity in one's own healthcare' that arose from the interviews is within a  
19 study setting of voluntary participants, in contrast with a screening population who may  
20 feel less able to decline. The evidence from the accounts nevertheless supports the  
21 impression that TNE can enhance a feeling of involvement, which is an important  
22 factor in uptake and concordance. Questions for the use of TNE as a screening tool  
23 remain. The inability of the EG Scan system to allow biopsies is one recurring concern  
24 for participants, and nasal discomfort is a significant drawback. There is evidence for  
25 higher comfort levels during endoscopy when thinner endoscopes (6 mm or less in  
26 diameter) are used, whether transnasally or transorally(25).  
27  
28  
29  
30  
31  
32  
33  
34  
35  
36  
37  
38  
39  
40  
41  
42  
43  
44  
45  
46  
47  
48  
49  
50  
51

52  
53 Contradicting views emergent from the data also provide important insights. The  
54 minority of participants who did not wish to view endoscopic images, those who would  
55 prefer C-OGD as a screening tool because of its established nature and individuals  
56  
57  
58  
59  
60

1  
2  
3 who would prefer to attend hospital for TNE rather than the community, all had valid  
4 reasons that warrant consideration. The participants realised that, as individuals who  
5 had pre-existing conditions or symptoms requiring OGD examination, they differed  
6 from a screening population, making direct comparisons impossible. Some of the  
7 reasons given for preferring aspects of C-OGD over TNE are indeed based in existing  
8 practices e.g. oesophageal biopsies in BO using C-OGD.  
9  
10  
11  
12  
13  
14  
15  
16

17  
18 Patient acceptability has been studied through qualitative means in related areas of  
19 gastrointestinal practice. The Cytosponge TFF-3 test is a means of diagnosing BO  
20 through non-endoscopic means. A study using semi-structured interviews and focus  
21 groups analysed responses from Cytosponge-naïve but eligible patients to gauge their  
22 impression of this test versus endoscopy, using videos and explanation of the clinical  
23 problem by a researcher(26). Qualitative research of patients undergoing C-OGD for  
24 BO reflect themes of comfort and control being important to them, which aligns well  
25 with our findings(27). Additionally, qualitative analysis of interviews has been  
26 conducted to gain an insight into factors affecting adherence to endoscopic screening,  
27 which would be a major factor in establishing an effective service(28).  
28  
29  
30  
31  
32  
33  
34  
35  
36  
37  
38  
39  
40  
41  
42  
43  
44  
45  
46  
47  
48  
49  
50  
51  
52  
53  
54  
55  
56  
57  
58  
59  
60

## Conclusions

The information collected in this patient-centred qualitative study has identified four main themes underlying the expectations and experiences of those undergoing TNE and C-OGD. They are inclusivity in one's own health care, comfort level and convenience, validity of the procedure and application to a screening population, and a sense of altruism and reciprocity. We believe that this analysis is a reliable reflection of the experiences of the patients involved and that it provides insights into the opportunities and challenges for interventions offered to patients selected as 'at risk' and therefore considered for screening. These insights could not have arisen from quantitative analyses of acceptability and highlight the strengths of thematic analysis in optimising clinical care. The themes align with the original study's VAS outcomes in suggesting that unsedated TNE is widely acceptable and are likely to reflect the experiences of at-risk screening populations within the wider community.

**Figure 1. The EG Scan<sup>TM</sup> II system. (A) the portable case with four main parts; (B) the image processor (top left), disposable probe (top right), air tube (bottom right) and hand-held controller (bottom left); (C) the system connected and ready for use; (D) close view of the capsule probe tip. (Reproduced with permission from Sami SS, et al. Copyright John Wiley and Sons).**

## Author Contributions

John J. McGoran: contributed to analysis, interpretation of data and drafted the manuscript.

Andrea Bennett: contributed to the acquisition of data and critical revision of the manuscript for important intellectual content.

Joanne Cooper: contributed to acquisition of data, interpretation of data and critical revision of the manuscript for important intellectual content.

John de Caestecker: contributed to the study supervision, interpretation of data and critical revision of the manuscript for important intellectual content.

Laurence B. Lovat: contributed to the study supervision, interpretation of data and critical revision of the manuscript for important intellectual content.

Indra Neil Guha: contributed to the acquisition of data, study supervision, interpretation of data and critical revision of the manuscript for important intellectual content.

Krish Ragunath: contributed to the conception, design and supervision of the study, acquisition of data, study supervision, interpretation of data and critical revision of the manuscript for important intellectual content.

Sarmed S. Sami: contributed to the conception, design and supervision of the study, acquisition of data; analysis; interpretation of data; and critical revision of the manuscript for important intellectual content.

### **Potential Conflicts of Interest**

Dr. S. S. Sami was funded by an Olympus-Core National Endoscopy Research Fellowship grant, Core Charity, United Kingdom (grant number: RB4803). This study was part funded by a grant from Intromedic Ltd, Seoul, South Korea.

Professor Krish Rangunath is a research grant recipient from Intromedic Ltd, Seoul, South Korea.

The other authors have no conflicts of interest to declare relevant to this publication.

### **Funding**

No direct funding has been received for this qualitative project. The two research grants described above concerned the original quantitative study.

### **Data Availability**

The data are interview transcripts which are held on a secure server based in Nottingham University Hospitals. Material is intellectual property of S Sami et al. and requests should be made to the corresponding author.



## References

1. Sami SS, Iyer PG, Pophali P, Halland M, di Pietro M, Ortiz-Fernandez-Sordo J, et al. Acceptability, Accuracy, and Safety of Disposable Transnasal Capsule Endoscopy for Barrett's Esophagus Screening. *Clin Gastroenterol Hepatol* 2018
2. Sami SS, Ragunath K, Wilkes EA, James M, Mansilla-Vivar R, Ortiz-Fernández-Sordo J, et al. The detection of oesophageal varices using a novel, disposable, probe-based transnasal endoscope: a prospective diagnostic pilot study. *Liver Int.* 2016;36(11):1639–48.
3. Shaheen NJ, Falk GW, Iyer PG. ACG Clinical Guideline : Diagnosis and Management of Barrett ' s Esophagus. 2015;(March):1–21.
4. Garcia-tsoo G, Abraldes JG, Berzigotti A, Bosch J. Portal Hypertensive Bleeding in Cirrhosis : Risk Stratification , Diagnosis , and Management : 2016 Practice Guidance by the American Association for the Study of Liver Diseases A . Purpose and Scope. *Hepatology.* 2017;65(1):310–35.
5. Tripathi D, Stanley AJ, Hayes PC, Patch D, Millson C, Mehrzad H, et al. UK guidelines on the management of variceal haemorrhage in cirrhotic patients. *Gut.* 2015;64(11):1680–704.
6. Fitzgerald RC, Di Pietro M, Ragunath K, Ang Y, Kang JY, Watson P, et al. British Society of Gastroenterology guidelines on the diagnosis and management of Barrett's oesophagus. *Gut.* 2014;63(1):7–42.
7. Hayeck TJ, Kong CY, Spechler SJ, Scott Gazelle G, Hur C. The Prevalence of Barrett's Esophagus in the US: Estimates from a Simulation Model Confirmed by SEER Data. *Dis. Esophagus* 2010;23(6):451-457
8. Thomopoulos K, Theocharis G, Mimidis K, Lampropoulou-Karatza C, Alexandridis E, Nikolopoulou V. Improved survival of patients presenting with acute variceal bleeding Prognostic indicators of short-and long-term mortality. *Dig. Liv. Dis.* 2006;38:899-904
9. Dunkley I, Griffiths H, Follows R, Ball A, Collins M, Dodds P, et al. UK consensus on

- 1  
2  
3 non-medical staffing required to deliver safe, quality-assured care for adult patients  
4  
5 undergoing gastrointestinal endoscopy. *Frontline Gastroenterol* 2018;0:1-11  
6  
7  
8 10. Cohen LB, Delegge MH, Aisenberg J, Brill J V, Inadomi JM, Kochman ML, et al. AGA  
9  
10 Institute Review of Endoscopic Sedation. *Gastroenterol.* 2007;133:675-701  
11  
12 11. Kruijshaar ME, Kerkhof M, Siersema PD, Steyerberg EW, Homs MY V, Essink-Bot M-  
13  
14 L, et al. The burden of upper gastrointestinal endoscopy in patients with Barrett's  
15  
16 esophagus. *Endoscopy.* 2006;38(09):873–8.  
17  
18 12. Beg S, Ragunath K, Wyman A, Banks M, Trudgill N, Pritchard MD, et al. Quality  
19  
20 standards in upper gastrointestinal endoscopy: A position statement of the British  
21  
22 Society of Gastroenterology (BSG) and Association of Upper Gastrointestinal  
23  
24 Surgeons of Great Britain and Ireland (AUGIS). *Gut.* 2017;66(11):1886–99.  
25  
26 13. Aedo MR, Zavala-González MÁ, Meixueiro-Daza A, María J, María R-T, Aedo R.  
27  
28 Accuracy of transnasal endoscopy with a disposable esophagoscope compared to  
29  
30 conventional endoscopy. *World J Gastrointest Endosc* 2014;6(4):128-136  
31  
32 14. Honing J, Kievit W, Bookelaar J, Peters Y, Iyer PG, Siersema PD. Endosheath  
33  
34 ultrathin transnasal endoscopy is a cost-effective method for screening for Barrett's  
35  
36 esophagus in patients with GERD symptoms. *Gastrointest Endosc* 2018  
37  
38  
39 15. Blevins CH, Egginton JS, Shah ND, Johnson ML, Iyer PG. Comparative Assessment  
40  
41 of Patient Preferences and Tolerability in Barrett Esophagus Screening: Results From  
42  
43 a Randomized Trial. *J Clin Gastroenterol.* 2018;52(10).  
44  
45 16. Likert R. A Technique for the Measurement of Attitudes. *Archives of Psychology*  
46  
47 1932;22(140):55  
48  
49 17. Marteau T, Bekker H. The development of a six-item short-form of the state scale of  
50  
51 the Spielberger State-Trait Anxiety Inventory (STAI). *Br J Clin Psychol.* 1992;31(Part  
52  
53 3):301–6.  
54  
55 18. Guest G, Bunce A, Johnson L. How Many Interviews Are Enough?: An Experiment  
56  
57 with Data Saturation and Variability. *Field methods.* 2006;18(1):59–82.  
58  
59 19. Tong A, Sainsbury P, Craig J. Consolidated criteria for reporting qualitative research  
60

- (COREQ): a 32-item checklist for interviews and focus groups. *Int J Qual Heal care.* 2007;19(6):349–57.
20. Braun V, Clarke V, Terry G. Thematic analysis. *Qual Res Clin Heal Psychol.* 2014;24:95–114.
21. Barbour RS. Checklists for improving rigour in qualitative research: a case of the tail wagging the dog? *BMJ.* 2001;322(7294):1115.
22. Calvo A, McCormack Brown K, McDermott RJ, Bryant CA, Coreil J, Loseke D. Social Construction of Cervical Cancer Screening among Panamanian Women. *Am J Heal Educ* 2012 May;43(3):153–63.
23. Wilson JMG, Jungner G. Principles and Practice of Screening for Disease. World Health Organization 1968.
24. Garrison, D. R. and Anderson, T. (2003) *E-Learning in the 21st Century: A Framework for Research and Practice.* London: Routledge/Falmer, 2003
25. Lin L-F, Ma K-Z, Tu H-L. A prospective randomized study comparing transnasal and peroral 5-mm ultrathin endoscopy. *J Formos Med Assoc* 2014;113:371–6.
26. Freeman M, Offman J, Walter FM, Sasieni P, Smith SG. Acceptability of the Cytosponge procedure for detecting Barrett's oesophagus: A qualitative study. *BMJ Open.* 2017;7(3):1–8.
27. Arney J, Hinojosa-Lindsey M, Street RL, Hou J, El-Serag HB, Naik AD. Patient Experiences with Surveillance Endoscopy: A Qualitative Study. *Dig Dis Sci* 2014 Jul;59(7):1378–85.
28. Sly JR, Edwards T, Shelton RC, Jandorf L. Identifying Barriers to Colonoscopy Screening for Nonadherent African American Participants in a Patient Navigation Intervention. *Heal Educ Behav* 2012 Oct 19;40(4):449–57.

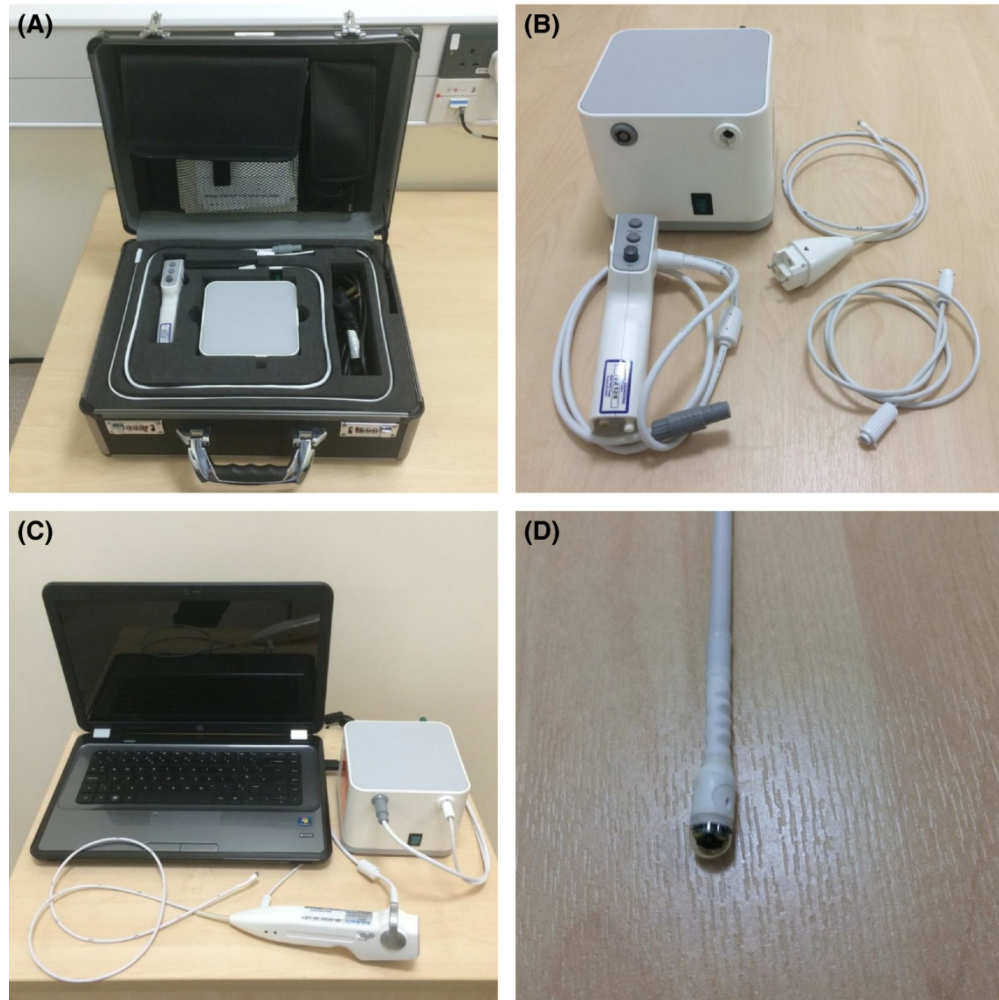

Figure 1. The EG ScanTM II system. (A) the portable case with four main parts; (B) the image processor (top left), disposable probe (top right), air tube (bottom right) and hand-held controller (bottom left); (C) the system connected and ready for use; (D) close view of the capsule probe tip. (Reproduced with permission from Sami SS, et al. Copyright John Wiley and Sons).

## COREQ (CONsolidated criteria for REporting Qualitative research) Checklist

A checklist of items that should be included in reports of qualitative research. You must report the page number in your manuscript where you consider each of the items listed in this checklist. If you have not included this information, either revise your manuscript accordingly before submitting or note N/A.

| Topic                                          | Item No. | Guide Questions/Description                                                                                                                              | Reported on Page No. |
|------------------------------------------------|----------|----------------------------------------------------------------------------------------------------------------------------------------------------------|----------------------|
| <b>Domain 1: Research team and reflexivity</b> |          |                                                                                                                                                          |                      |
| <i>Personal characteristics</i>                |          |                                                                                                                                                          |                      |
| Interviewer/facilitator                        | 1        | Which author/s conducted the interview or focus group?                                                                                                   |                      |
| Credentials                                    | 2        | What were the researcher's credentials? E.g. PhD, MD                                                                                                     |                      |
| Occupation                                     | 3        | What was their occupation at the time of the study?                                                                                                      |                      |
| Gender                                         | 4        | Was the researcher male or female?                                                                                                                       |                      |
| Experience and training                        | 5        | What experience or training did the researcher have?                                                                                                     |                      |
| <i>Relationship with participants</i>          |          |                                                                                                                                                          |                      |
| Relationship established                       | 6        | Was a relationship established prior to study commencement?                                                                                              |                      |
| Participant knowledge of the interviewer       | 7        | What did the participants know about the researcher? e.g. personal goals, reasons for doing the research                                                 |                      |
| Interviewer characteristics                    | 8        | What characteristics were reported about the interviewer/facilitator? e.g. Bias, assumptions, reasons and interests in the research topic                |                      |
| <b>Domain 2: Study design</b>                  |          |                                                                                                                                                          |                      |
| <i>Theoretical framework</i>                   |          |                                                                                                                                                          |                      |
| Methodological orientation and Theory          | 9        | What methodological orientation was stated to underpin the study? e.g. grounded theory, discourse analysis, ethnography, phenomenology, content analysis |                      |
| <i>Participant selection</i>                   |          |                                                                                                                                                          |                      |
| Sampling                                       | 10       | How were participants selected? e.g. purposive, convenience, consecutive, snowball                                                                       |                      |
| Method of approach                             | 11       | How were participants approached? e.g. face-to-face, telephone, mail, email                                                                              |                      |
| Sample size                                    | 12       | How many participants were in the study?                                                                                                                 |                      |
| Non-participation                              | 13       | How many people refused to participate or dropped out? Reasons?                                                                                          |                      |
| <i>Setting</i>                                 |          |                                                                                                                                                          |                      |
| Setting of data collection                     | 14       | Where was the data collected? e.g. home, clinic, workplace                                                                                               |                      |
| Presence of non-participants                   | 15       | Was anyone else present besides the participants and researchers?                                                                                        |                      |
| Description of sample                          | 16       | What are the important characteristics of the sample? e.g. demographic data, date                                                                        |                      |
| <i>Data collection</i>                         |          |                                                                                                                                                          |                      |
| Interview guide                                | 17       | Were questions, prompts, guides provided by the authors? Was it pilot tested?                                                                            |                      |
| Repeat interviews                              | 18       | Were repeat interviews carried out? If yes, how many?                                                                                                    |                      |
| Audio/visual recording                         | 19       | Did the research use audio or visual recording to collect the data?                                                                                      |                      |
| Field notes                                    | 20       | Were field notes made during and/or after the interview or focus group?                                                                                  |                      |
| Duration                                       | 21       | What was the duration of the interviews or focus group?                                                                                                  |                      |
| Data saturation                                | 22       | Was data saturation discussed?                                                                                                                           |                      |
| Transcripts returned                           | 23       | Were transcripts returned to participants for comment and/or                                                                                             |                      |

| Topic                                  | Item No. | Guide Questions/Description                                                                                                        | Reported on Page No. |
|----------------------------------------|----------|------------------------------------------------------------------------------------------------------------------------------------|----------------------|
|                                        |          | correction?                                                                                                                        |                      |
| <b>Domain 3: analysis and findings</b> |          |                                                                                                                                    |                      |
| <i>Data analysis</i>                   |          |                                                                                                                                    |                      |
| Number of data coders                  | 24       | How many data coders coded the data?                                                                                               |                      |
| Description of the coding tree         | 25       | Did authors provide a description of the coding tree?                                                                              |                      |
| Derivation of themes                   | 26       | Were themes identified in advance or derived from the data?                                                                        |                      |
| Software                               | 27       | What software, if applicable, was used to manage the data?                                                                         |                      |
| Participant checking                   | 28       | Did participants provide feedback on the findings?                                                                                 |                      |
| <i>Reporting</i>                       |          |                                                                                                                                    |                      |
| Quotations presented                   | 29       | Were participant quotations presented to illustrate the themes/findings?<br>Was each quotation identified? e.g. participant number |                      |
| Data and findings consistent           | 30       | Was there consistency between the data presented and the findings?                                                                 |                      |
| Clarity of major themes                | 31       | Were major themes clearly presented in the findings?                                                                               |                      |
| Clarity of minor themes                | 32       | Is there a description of diverse cases or discussion of minor themes?                                                             |                      |

Developed from: Tong A, Sainsbury P, Craig J. Consolidated criteria for reporting qualitative research (COREQ): a 32-item checklist for interviews and focus groups. *International Journal for Quality in Health Care*. 2007. Volume 19, Number 6: pp. 349 – 357

**Once you have completed this checklist, please save a copy and upload it as part of your submission. DO NOT include this checklist as part of the main manuscript document. It must be uploaded as a separate file.**

# BMJ Open

## Acceptability to patients of screening disposable transnasal endoscopy: qualitative interview analysis

|                                 |                                                                                                                                                                                                                                                                                                                                                                                                                                                                                                                                                                                          |
|---------------------------------|------------------------------------------------------------------------------------------------------------------------------------------------------------------------------------------------------------------------------------------------------------------------------------------------------------------------------------------------------------------------------------------------------------------------------------------------------------------------------------------------------------------------------------------------------------------------------------------|
| Journal:                        | <i>BMJ Open</i>                                                                                                                                                                                                                                                                                                                                                                                                                                                                                                                                                                          |
| Manuscript ID                   | bmjopen-2019-030467.R2                                                                                                                                                                                                                                                                                                                                                                                                                                                                                                                                                                   |
| Article Type:                   | Original research                                                                                                                                                                                                                                                                                                                                                                                                                                                                                                                                                                        |
| Date Submitted by the Author:   | 27-Oct-2019                                                                                                                                                                                                                                                                                                                                                                                                                                                                                                                                                                              |
| Complete List of Authors:       | McGoran, John; University Hospitals of Leicester NHS Trust, Bennett, Andrea; Nottingham University Hospitals NHS Trust<br>Cooper, Joanne; Nottingham University Hospitals NHS Trust, Corporate<br>De Caestecker, John; University Hospitals of Leicester NHS Trust<br>Lovat, Laurence; University College London, Division of Surgery and<br>Interventional Science<br>Guha, Neil; Nottingham University Hospitals NHS Trust<br>Ragunath, Krish; Nottingham University Hospitals NHS Trust<br>Sami, Sarmed; University College London, Division of Surgery and<br>Interventional Science |
| <b>Primary Subject Heading</b>: | Gastroenterology and hepatology                                                                                                                                                                                                                                                                                                                                                                                                                                                                                                                                                          |
| Secondary Subject Heading:      | Evidence based practice, Health policy, Patient-centred medicine                                                                                                                                                                                                                                                                                                                                                                                                                                                                                                                         |
| Keywords:                       | Endoscopy < GASTROENTEROLOGY, Oesophageal disease < GASTROENTEROLOGY, Hepatology < INTERNAL MEDICINE                                                                                                                                                                                                                                                                                                                                                                                                                                                                                     |
|                                 |                                                                                                                                                                                                                                                                                                                                                                                                                                                                                                                                                                                          |

SCHOLARONE™  
Manuscripts

1  
2  
3  
4  
5  
6  
7  
8  
9  
10  
11  
12  
13  
14  
15  
16  
17  
18  
19  
20  
21  
22  
23  
24  
25  
26  
27  
28  
29  
30  
31  
32  
33  
34  
35  
36  
37  
38  
39  
40  
41  
42  
43  
44  
45  
46  
47  
48  
49  
50  
51  
52  
53  
54  
55  
56  
57  
58  
59  
60

## Acceptability to patients of screening disposable transnasal endoscopy: qualitative interview analysis

John J. McGoran<sup>1</sup>, Andrea Bennett<sup>2</sup>, Joanne Cooper<sup>2</sup>, John de Caestecker<sup>1</sup>, Laurence B. Lovat<sup>3</sup>, Indra Neil Guha<sup>2</sup>, Krish Ragunath<sup>2</sup>, Sarmed S. Sami<sup>3</sup>

<sup>1</sup>Digestive Diseases Centre, University Hospitals of Leicester NHS Trust, UK

<sup>2</sup>National Institute for Health Research (NIHR) Biomedical Research Center in Gastrointestinal and Liver Diseases at Nottingham University Hospitals NHS Trust and the University of Nottingham, Queens Medical Center Campus, Nottingham, UK.

<sup>3</sup>Division of Surgery and Interventional Science, University College London, London, UK.

Correspondence to: Sarmed Sami s.sami@ucl.ac.uk

Short Title: Transnasal endoscopy: Qualitative analysis

Word Count (excluding references and figures/tables): 4098

### Abstract



## Objectives

Screening in selected high risk populations for Barrett's oesophagus (BO) and oesophageal varices (OVs) has been proposed, but there are obstacles with conventional oesophagogastroduodenoscopy (C-OGD), including patient acceptability. Portable and disposable office-based transnasal endoscopy (TNE) is a feasible and accurate alternative to C-OGD that may have use in primary and secondary care. This article outlines a qualitative analysis of patient experiences of TNE and C-OGD in order to gain an insight into an acceptable delivery of an endoscopic screening service.

## Design

Purposeful sampling identified 23 participants who then underwent semi-structured interviews to determine their experiences of both procedures. Thematic analysis was conducted to derive meaning from their lived experiences.

## Setting

A secondary care endoscopy unit, clinic room and interview room.

## Participants

Patients referred for BO or OV surveillance and for endoscopy to investigate dyspepsia underwent unsedated TNE using the EG Scan II device followed by C-OGD with or without sedation (patient choice), as part of a clinical trial.

## Results

The themes that arose from our analysis were: inclusivity in one's own health care; comfort level and convenience; validity of the procedure and application to a screening population; and a sense of altruism and reciprocity.

Positive aspects of TNE included participant empowerment, reduced discomfort and avoidance of conscious sedation. Participants felt that if TNE screening was of proven

1  
2  
3 efficacy it would be welcomed, though views on use in a community setting were  
4  
5 mixed.  
6

## 7 **Conclusions**

8  
9  
10 Most patients preferred TNE to unsedated C-OGD and the reasons they gave featured  
11  
12 strongly in the emerging themes. Preferences between TNE and sedated C-OGD  
13  
14 were more subtle, with equivalent comfort scores but merits and drawbacks of both  
15  
16 being discussed. This information identifies opportunities and challenges in  
17  
18 establishing an endoscopic screening service.  
19  
20  
21  
22  
23  
24  
25  
26  
27

28 Keywords: endoscopy, oesophageal disease, hepatology  
29  
30  
31

## 32 **Strengths and Limitations of the study**

- 33  
34  
35  
36  
37  
38  
39  
40  
41  
42  
43  
44  
45  
46  
47  
48  
49  
50  
51  
52  
53  
54  
55  
56  
57  
58  
59  
60
- The size of the original study, in which 100 patients from this centre alone allowed for a broad stated aim and collection of participants until data saturation was reached.
  - Every participant had clinic-based TNE before C-OGD so their experiences of the TNE would reflect that of a person undergoing screening more so than if C-OGD was done first.
  - The advantage in performing thematic analysis on the data gathered from interviews is that it allowed us to develop clear themes, which could allow transferability to other potential screening populations however this may be limited in non-research settings and other screening modalities.

- To maximise the credibility and dependability of the findings, reflexivity, in which the impact of the researcher and social environment on each other is acknowledged and managed, was employed at each stage. Care was taken not to manipulate participants into giving accounts that favoured or condemned either endoscopic test.
- An ordering effect cannot be quantified as all participants had TNE first and C-OGD second but we suggest that this order could have an impact on their perceptions of the endoscopic examinations.

## Introduction

1  
2  
3 Portable and disposable office-based transnasal endoscopy (TNE) is a feasible and  
4 accurate alternative to conventional oesophagogastroduodenoscopy (C-OGD) that  
5 may have use in primary and secondary care(1,2). Several authorities have  
6 highlighted the need to identify alternative, minimally-invasive screening tests for  
7 Barrett's oesophagus (BO) and oesophageal varices (OV) which are precursor  
8 conditions for oesophageal adenocarcinoma (OAC) and variceal bleeding,  
9 respectively(3–6). The incidence and mortality from OAC have risen rapidly over the  
10 last few decades(7). This has prompted efforts to screen high risk patients who are  
11 predominantly white, male, age 55 or over, with chronic reflux symptoms for BO(6).  
12 The prevalence in women is lower but exact proportions are unclear. Similarly,  
13 incidence and mortality from chronic liver disease is also rising, with one of the major  
14 contributors being variceal haemorrhage(8). It is recommended practice to screen for  
15 varices using endoscopy in all patients with cirrhosis but the cost-effectiveness of this  
16 approach has been questioned(5).

17  
18  
19  
20  
21  
22  
23  
24  
25  
26  
27  
28  
29  
30  
31  
32  
33  
34  
35  
36  
37  
38  
39  
40  
41  
42  
43  
44  
45  
46  
47  
48  
49  
50  
51  
52  
53  
54  
55  
56  
57  
58  
59  
60  
61  
62  
63  
64  
65  
66  
67  
68  
69  
70  
71  
72  
73  
74  
75  
76  
77  
78  
79  
80  
81  
82  
83  
84  
85  
86  
87  
88  
89  
90  
91  
92  
93  
94  
95  
96  
97  
98  
99  
100  
101  
102  
103  
104  
105  
106  
107  
108  
109  
110  
111  
112  
113  
114  
115  
116  
117  
118  
119  
120  
121  
122  
123  
124  
125  
126  
127  
128  
129  
130  
131  
132  
133  
134  
135  
136  
137  
138  
139  
140  
141  
142  
143  
144  
145  
146  
147  
148  
149  
150  
151  
152  
153  
154  
155  
156  
157  
158  
159  
160  
161  
162  
163  
164  
165  
166  
167  
168  
169  
170  
171  
172  
173  
174  
175  
176  
177  
178  
179  
180  
181  
182  
183  
184  
185  
186  
187  
188  
189  
190  
191  
192  
193  
194  
195  
196  
197  
198  
199  
200  
201  
202  
203  
204  
205  
206  
207  
208  
209  
210  
211  
212  
213  
214  
215  
216  
217  
218  
219  
220  
221  
222  
223  
224  
225  
226  
227  
228  
229  
230  
231  
232  
233  
234  
235  
236  
237  
238  
239  
240  
241  
242  
243  
244  
245  
246  
247  
248  
249  
250  
251  
252  
253  
254  
255  
256  
257  
258  
259  
260  
261  
262  
263  
264  
265  
266  
267  
268  
269  
270  
271  
272  
273  
274  
275  
276  
277  
278  
279  
280  
281  
282  
283  
284  
285  
286  
287  
288  
289  
290  
291  
292  
293  
294  
295  
296  
297  
298  
299  
300  
301  
302  
303  
304  
305  
306  
307  
308  
309  
310  
311  
312  
313  
314  
315  
316  
317  
318  
319  
320  
321  
322  
323  
324  
325  
326  
327  
328  
329  
330  
331  
332  
333  
334  
335  
336  
337  
338  
339  
340  
341  
342  
343  
344  
345  
346  
347  
348  
349  
350  
351  
352  
353  
354  
355  
356  
357  
358  
359  
360  
361  
362  
363  
364  
365  
366  
367  
368  
369  
370  
371  
372  
373  
374  
375  
376  
377  
378  
379  
380  
381  
382  
383  
384  
385  
386  
387  
388  
389  
390  
391  
392  
393  
394  
395  
396  
397  
398  
399  
400  
401  
402  
403  
404  
405  
406  
407  
408  
409  
410  
411  
412  
413  
414  
415  
416  
417  
418  
419  
420  
421  
422  
423  
424  
425  
426  
427  
428  
429  
430  
431  
432  
433  
434  
435  
436  
437  
438  
439  
440  
441  
442  
443  
444  
445  
446  
447  
448  
449  
450  
451  
452  
453  
454  
455  
456  
457  
458  
459  
460  
461  
462  
463  
464  
465  
466  
467  
468  
469  
470  
471  
472  
473  
474  
475  
476  
477  
478  
479  
480  
481  
482  
483  
484  
485  
486  
487  
488  
489  
490  
491  
492  
493  
494  
495  
496  
497  
498  
499  
500  
501  
502  
503  
504  
505  
506  
507  
508  
509  
510  
511  
512  
513  
514  
515  
516  
517  
518  
519  
520  
521  
522  
523  
524  
525  
526  
527  
528  
529  
530  
531  
532  
533  
534  
535  
536  
537  
538  
539  
540  
541  
542  
543  
544  
545  
546  
547  
548  
549  
550  
551  
552  
553  
554  
555  
556  
557  
558  
559  
560  
561  
562  
563  
564  
565  
566  
567  
568  
569  
570  
571  
572  
573  
574  
575  
576  
577  
578  
579  
580  
581  
582  
583  
584  
585  
586  
587  
588  
589  
590  
591  
592  
593  
594  
595  
596  
597  
598  
599  
600  
601  
602  
603  
604  
605  
606  
607  
608  
609  
610  
611  
612  
613  
614  
615  
616  
617  
618  
619  
620  
621  
622  
623  
624  
625  
626  
627  
628  
629  
630  
631  
632  
633  
634  
635  
636  
637  
638  
639  
640  
641  
642  
643  
644  
645  
646  
647  
648  
649  
650  
651  
652  
653  
654  
655  
656  
657  
658  
659  
660  
661  
662  
663  
664  
665  
666  
667  
668  
669  
670  
671  
672  
673  
674  
675  
676  
677  
678  
679  
680  
681  
682  
683  
684  
685  
686  
687  
688  
689  
690  
691  
692  
693  
694  
695  
696  
697  
698  
699  
700  
701  
702  
703  
704  
705  
706  
707  
708  
709  
710  
711  
712  
713  
714  
715  
716  
717  
718  
719  
720  
721  
722  
723  
724  
725  
726  
727  
728  
729  
730  
731  
732  
733  
734  
735  
736  
737  
738  
739  
740  
741  
742  
743  
744  
745  
746  
747  
748  
749  
750  
751  
752  
753  
754  
755  
756  
757  
758  
759  
760  
761  
762  
763  
764  
765  
766  
767  
768  
769  
770  
771  
772  
773  
774  
775  
776  
777  
778  
779  
780  
781  
782  
783  
784  
785  
786  
787  
788  
789  
790  
791  
792  
793  
794  
795  
796  
797  
798  
799  
800  
801  
802  
803  
804  
805  
806  
807  
808  
809  
810  
811  
812  
813  
814  
815  
816  
817  
818  
819  
820  
821  
822  
823  
824  
825  
826  
827  
828  
829  
830  
831  
832  
833  
834  
835  
836  
837  
838  
839  
840  
841  
842  
843  
844  
845  
846  
847  
848  
849  
850  
851  
852  
853  
854  
855  
856  
857  
858  
859  
860  
861  
862  
863  
864  
865  
866  
867  
868  
869  
870  
871  
872  
873  
874  
875  
876  
877  
878  
879  
880  
881  
882  
883  
884  
885  
886  
887  
888  
889  
890  
891  
892  
893  
894  
895  
896  
897  
898  
899  
900  
901  
902  
903  
904  
905  
906  
907  
908  
909  
910  
911  
912  
913  
914  
915  
916  
917  
918  
919  
920  
921  
922  
923  
924  
925  
926  
927  
928  
929  
930  
931  
932  
933  
934  
935  
936  
937  
938  
939  
940  
941  
942  
943  
944  
945  
946  
947  
948  
949  
950  
951  
952  
953  
954  
955  
956  
957  
958  
959  
960  
961  
962  
963  
964  
965  
966  
967  
968  
969  
970  
971  
972  
973  
974  
975  
976  
977  
978  
979  
980  
981  
982  
983  
984  
985  
986  
987  
988  
989  
990  
991  
992  
993  
994  
995  
996  
997  
998  
999  
1000

Currently, the standard of care for assessing BO and OVs is hospital-based conventional oesophagogastroduodenoscopy (C-OGD). This requires a fully equipped endoscopy department, complete with nursing support, recovery facilities, monitoring, and decontamination rooms(9). Patients frequently require conscious sedation(10). C-OGD can be perceived to be an uncomfortable experience for the patient which may prompt those eligible for screening not to attend(11,12). These features of C-OGD fail to meet screening principles of cost-effectiveness and acceptability.

To overcome this, various alternative screening tools for high risk groups have been proposed and remain largely the preserve of research studies. Portable and disposable transnasal endoscopy (TNE) as a method of screening for BO and OVs is

1  
2  
3 one such tool that has been proposed as a solution. The suggested benefits of TNE  
4 over C-OGD include allowing the patient to speak during the examination, increased  
5 comfort levels and avoidance of sedation. It has been shown to be both accurate and  
6  
7  
8  
9  
10 cost-effective as a potential screening tool(1,2,13,14). The EG scan™ II system  
11  
12 (Intromedic Ltd., Seoul, South Korea) is a transnasal endoscopic device with a  
13  
14 disposable 6mm diameter probe. It has an air insufflation channel but no biopsy or  
15  
16 irrigation port and is designed to be a method of visualising various upper  
17  
18 gastrointestinal conditions (Figure 1). The apparatus has been designed for use in a  
19  
20 consultation room, as a 'clinic-based' procedure, with potential for use in general  
21  
22  
23  
24  
25  
26  
27  
28  
29  
30  
31  
32  
33  
34  
35  
36  
37  
38  
39  
40  
41  
42  
43  
44  
45  
46  
47  
48  
49  
50  
51  
52  
53  
54  
55  
56  
57  
58  
59  
60  
practice.

The tolerability regarding comfort levels of TNE compared with that of C-OGD has  
been studied using visual scales and questionnaires in randomised trials, assessing  
attitudes towards and experience of sedated C-OGD and unsedated TNE that allow a  
simple measure of preference between the two(15). Acceptability is a deeper concept,  
that takes into consideration not only comfort scores but the global patient experience  
and willingness to undergo the intervention. It may act as an indicator of patient uptake  
and inform strategies for recruitment on a population level. To date, we have no  
knowledge of any qualitative studies that have considered the acceptability of TNE to  
patients who have undergone both it and C-OGD in a controlled environment. The  
lived experiences of those who undergo these procedures can inform preference and  
identify the challenges or opportunities for healthcare systems.

Tolerability and preference scores like the visual analogue scale (VAS) and the  
Spielberger State Trait Anxiety Inventory (STAI-6) questionnaire are helpful ways of  
assessing the impressions of large populations of patients towards a healthcare

1  
2  
3 experience(16,17). They do not however permit reflection, nuance and richer insights  
4  
5 into the experiences of individuals and therefore do not inform service development in  
6  
7 the same way that qualitative methods do. A deeper analysis of these experiences  
8  
9 could add to the clinical community's understanding of a patient's decision-making  
10  
11 process and enhance human factors in screening or surveillance such as recruitment  
12  
13 and retention.  
14  
15

16  
17  
18 The aims of this study were to explore the expectations and experiences of patients  
19  
20 who underwent both TNE in an outpatient setting and C-OGD on the same day through  
21  
22 qualitative analysis, and to determine the factors that impact on the acceptability of  
23  
24 TNE as a potential screening and surveillance tool.  
25  
26  
27  
28  
29  
30  
31  
32  
33  
34  
35  
36  
37  
38  
39  
40  
41  
42  
43  
44  
45  
46  
47  
48  
49  
50  
51  
52  
53  
54  
55  
56  
57

## 58 **Methods**

59  
60

## Study Design and Setting

A qualitative methodology was employed, with the analysis of experiences and perceptions of both C-OGD and clinic-based TNE, using face-to-face semi-structured interviews. This builds on wider research examining the technical feasibility, quality, safety, acceptability (through scoring measures) and accuracy of clinic-based TNE using the EG Scan compared to C-OGD as the reference standard(1). A pictorial outline of this equipment is represented in Figure 1. Whereas the original research was conducted in three different centres, the collection of information with respect to this qualitative study was done at one centre (Nottingham, UK) with all patients having undergone both endoscopic procedures at that location.

The East Midlands division of the Research Ethics Committee granted approval for the study (REC reference 12/EM/0100). It was prospectively registered (ISRCTN registry identifier: 70595405). Specific consent forms for these interviews were devised and confirmation of consent was obtained prior to each interview. Interview transcripts have been stored on an encrypted secure drive at the study site.

## Participants and Recruitment

Purposeful sampling took place, in which most of the individuals in one centre involved in the wider research project were identified as potential participants before being contacted by telephone within four weeks of the day of endoscopy. This is a common recruitment approach in qualitative research which contrasts with random sampling in quantitative research that seeks to reduce selection bias. Three patient groups were

1  
2  
3 identified: those with histologically confirmed BO, those warranting OV screening or  
4 surveillance, and those with dyspepsia referred for diagnostic endoscopy. The  
5 experiences of all 47 patients were considered valid for an analysis of acceptability as  
6 they reflected a suitably healthy and communicative cohort, with three out of 50  
7 ineligible because of ill health. Recruitment approaches for the quantitative and  
8 qualitative studies were done in parallel, with individuals approached for their consent  
9 to participate in an interview-based research study at the same time as for the  
10 quantitative study. They were then followed up within four weeks to ensure willingness  
11 to proceed with interview. Only the three individuals mentioned above withdrew  
12 consent or were withdrawn because of ill health. Those who could not tolerate both  
13 endoscopic examinations or who underwent variceal band ligation during C-OGD were  
14 excluded from recruitment to interview as their lived experiences were deemed to be  
15 considerably different from the rest. Sedated and unsedated patients were considered  
16 equally valid as this variation is reflected in clinical practice.

17  
18  
19 It was anticipated that a minimum of twenty interviews would have to be conducted to  
20 gather sufficient information. This was informed in part by existing literature(18). After  
21 23 interviews were conducted, the researchers reviewed the merits of conducting  
22 further data collection as it would have required further appointments. After a  
23 preliminary period of data analysis it was proposed that saturation had been reached  
24 and no further participants would be required. The full thematic analysis of the existing  
25 interview transcripts supported this and it was agreed by the research team that further  
26 significant insights were unlikely to be gained from additional interviews.

## 27 28 29 30 31 32 33 34 35 36 37 38 39 40 41 42 43 44 45 46 47 48 49 50 51 52 53 54 55 56 **Data Collection** 57 58 59 60



1  
2  
3 The interviews were conducted with interviewers guided by a topic schedule, that was  
4 agreed by consensus of the researchers. The scheduled questions related to all  
5 aspects of the endoscopic procedures and participants' views on the use of TNE in  
6 the community. Broad points included exploration of participants' prior understanding  
7 and expectations of undergoing both forms of endoscopy procedure, their experiences  
8 of the procedures and factors influencing this, and their recommendations for future  
9 service provision, including any information or support needs. Box 1 outlines the  
10 interview schedule further. The semi-structured nature of the interviews allowed the  
11 skilled researchers to explore the given answers with further probing and digression  
12 from the core topics. The topics and questions arose from the experiences of the  
13 researcher as clinicians in caring for patients undergoing endoscopy and knowledge  
14 of the processes of the original study where there was significant Patient and Public  
15 Involvement (1,2). Both interviewers were female registered research nurses  
16 independent of the main study team and blinded to the patients' tolerability scores.  
17 The interviewers received site training to familiarise themselves with qualitative  
18 research and are subject to regular appraisal and research training, with oversight  
19 from a research team that includes an academic with a nursing background. The study  
20 was conducted and reported according to the COREQ standards for qualitative  
21 research(19).

22  
23  
24 Interviews were recorded on an encrypted device and lasted between twenty and thirty  
25 five minutes. Following this, recordings were transcribed to Microsoft Word documents  
26 undertaken by a professional transcriber who consciously checked their actions in  
27 retrospect and ensured that the transcripts were anonymised.

**Box 1. Schedule for use by research nurses conducting semi-structured interview**

- Explore events that led to participant requiring endoscopy- ideas, concerns, expectations
- Explore experiences of both tests to compare and contrast; short description
- Ask about environment in which each test took place- description; feelings
- Revisit visual analogue score to allow discussion over preferred test and explore

## Data Analysis

Transcribed interviews underwent thematic analysis by one researcher (JM) who was not involved in the study beforehand but fully briefed of the processes. Transcripts were read at least twice with broad notes being made of descriptions and sentiments from which possible recurrent themes could arise(20). The transcripts were then entered into NVivo version 12 (QSR International, Melbourne, Australia) software, which helped to identify the frequency of language used and its relation to other statements, to determine the relevance of the language used to the research aims. These patterns were again considered by the researcher and the themes were arrived at. Themes were again checked with the supporting text and interpretations drawn.

## Rigour

In order to ensure scientific rigour, checks were made at each stage of this study by primarily referring to the COREQ criteria, while taking care not to compromise the unique contribution that good quantitative research can bring to scientific progress(19)(21). The research team also discussed the analysis frequently, using existing theoretical frameworks to ensure competent data collection and analysis. Our transcripts were analysed for deviant cases, which were noted to be equally valid to

1  
2  
3 majority perspectives. As clinicians delivering endoscopic examination in daily  
4  
5 practice, it was important for the team undertaking this qualitative analysis to exercise  
6  
7 reflexivity. Consideration was made to the data collection, interpretation and arrival at  
8  
9 themes through reflective discussion and self-analysis. Specifically, awareness of the  
10  
11 VAS for comfort from the original study was noted and care taken not to apply this to  
12  
13 the qualitative analysis. With an acknowledgement of individual and collective biases  
14  
15 and motives, the researchers carefully tried to ensure that the themes arose from the  
16  
17 participants' accounts alone. There may be a significant ordering effect resulting from  
18  
19 TNE being performed before C-OGD in all cases. The quantitative study which  
20  
21 analysed the diagnostic accuracy, safety, cost-effectiveness and tolerability using VAS  
22  
23 required this specific ordering. It does however represent a limitation in the case of the  
24  
25 qualitative analysis. Involvement of the lead author (JM) who has no conflict of interest  
26  
27 of note pertaining to device manufacturers, served to reduce the impact of apparent  
28  
29 interpretative bias.  
30  
31  
32  
33  
34  
35

### 36 **Patient and Public Involvement**

37  
38  
39 The participants in this analysis were part of a larger study as noted earlier. Following  
40  
41 TNE and C-OGD patients were asked to complete a questionnaire on their  
42  
43 experiences of these tests. Analysis of the questionnaires and encounters between  
44  
45 researchers and patients during this time strongly informed the preparation for semi-  
46  
47 structured interviews. In addition, throughout this process the input of the Patient and  
48  
49 Public Involvement group at Nottingham Biomedical Research Centre was taken into  
50  
51 consideration in terms of aims, design, patient consent and information leaflets.  
52  
53  
54  
55  
56 Details of the research study are to be made available to participants on request.  
57  
58  
59  
60

1  
2  
3  
4  
5  
6  
7  
8  
9  
10  
11  
12  
13  
14  
15  
16  
17  
18  
19  
20  
21  
22  
23  
24  
25  
26  
27  
28  
29  
30  
31  
32  
33  
34  
35  
36  
37  
38  
39  
40  
41  
42  
43  
44  
45  
46  
47  
48  
49  
50  
51  
52  
53  
54  
55  
56  
57  
58  
59  
60

For peer review only

## Results

Twenty-three interviews took place, with participants having BO (n=11), OVs (n=8) or neither of these (those referred for investigation of dyspepsia) (n=4).(Table 1) Given

1  
2  
3 the standard approach of the two endoscopic procedures, excluding those having had  
4 variceal band ligation, it was determined that all participants shared a similar lived  
5 experience and could all give accounts that can provide insights into the acceptability  
6 of TNE as a screening tool for either BO or OVs. For the purposes of the thematic  
7 analysis it was therefore not thought necessary to divide the groups according to their  
8 indication for endoscopy. The majority (17/23) of participants were men, which  
9 somewhat represents the gender balance in those having endoscopic examination for  
10 BO and OVs. The presence of sedation for C-OGD was a factor in participants' lived  
11 experiences and this was taken into account during interview of each individual. Recall  
12 of events differed between participants because of sedation however the absence of  
13 perceived discomfort is as important a feature of acceptability as conscious and  
14 remembered tolerability, when considering attitudes towards this test. The  
15 inconvenient aspects of intravenous sedation such as increased length of clinical  
16 observation and a 'hangover effect' were also discussed.  
17  
18  
19  
20  
21  
22  
23  
24  
25  
26  
27  
28  
29  
30  
31  
32  
33  
34  
35  
36  
37  
38  
39  
40  
41  
42  
43  
44  
45  
46  
47  
48  
49  
50  
51  
52

|                                                 |
|-------------------------------------------------|
| Basic Demographics of 23 Interview Participants |
|                                                 |

|                                                                  |            |
|------------------------------------------------------------------|------------|
| Males (n/23)                                                     | 17         |
| Sedation for C-OGD (n/23)                                        | 13         |
| Median Age (range)                                               | 66 (48-83) |
| Barrett's Oesophagus (n male)                                    | 11 (9)     |
| Liver Disease warranting Varices Screening/Surveillance (n male) | 8 (6)      |
| Dyspepsia (n male)                                               | 4 (2)      |

**Table 1.** Demographic and sedation details of 23 interview participants. Reflective of the general population for BO and cirrhotic liver disease, males represent the majority of participants. Sedation status for C-OGD was decided on by fully informed participants.

Four themes were identified after thematic analysis. The four themes were: i) inclusivity in one's own health care; ii) comfort level and convenience; iii) validity of the procedure and application to a screening population; iv) a sense of altruism and reciprocity. The evidence supporting these four themes is outlined below, illustrated with excerpts from transcripts.

### **Inclusivity in one's own healthcare**

1  
2  
3 On attending for the dual endoscopic tests as part of a research study, most  
4 participants described feeling well-informed of the procedures and involved in the  
5 decision-making process. Two people expressed initial wariness of TNE as they did  
6 not know what to expect but felt reassured after a fuller explanation. Every participant  
7 acknowledged that they had consented with appropriate knowledge of each  
8 procedure. TNE was described as “*empowering*”, “*fascinating*” and a participant stated  
9 that they would “*definitely*” have it done again. Specific comments regarding TNE’s  
10 merits included that they could speak with the operator, sit up in a chair and view their  
11 endoscopic images if they wished- “*I could watch it on the monitor*” (male, 70,  
12 *dyspepsia*).  
13  
14  
15  
16  
17  
18  
19  
20  
21  
22  
23  
24  
25  
26

27 By contrast, the “impersonal” C-OGD made participants feel “trapped” and  
28 “claustrophobic” or like in “a production line”. Comments were highly suggestive of a  
29 disinclination to undergo C-OGD. Unfavourable comments about C-OGD were  
30 underlined by participants’ responses to queries over their involvement in the decision  
31 making process- “*I could have said no. But I came looking for help* (male, 70,  
32 *dyspepsia*).”, “*as a patient, I have the ultimate say* (male, 66, *liver disease*).” The  
33 existence of established guidelines, best practice and trust in the decision-making of  
34 medical professionals prompted attendance for endoscopic tests, with one participant  
35 summarising the feelings of many others by saying “*If you’ve got to have a test, you’ve*  
36 *got to have a test.*” Another participant said of C-OGD, “*I know it’s part of the care,*  
37 *that you’ve got to have it done*” (female, 83, *Barrett’s*). Participants used their  
38 knowledge of their chronic conditions and their symptoms as accompanying motives  
39 for having endoscopic tests.  
40  
41  
42  
43  
44  
45  
46  
47  
48  
49  
50  
51  
52  
53  
54  
55  
56  
57

### 58 **Comfort level and convenience**

59  
60

1  
2  
3 As part of the original study, every participant completed visual analogue scales of  
4 their experiences of each endoscopic procedure. The interviewers had access to the  
5 VAS for each participants and reminded them of the score out of ten they gave, before  
6 exploring the reason for this and any change in attitude made in retrospect. This part  
7 of the data collection reaffirmed that the majority preferred TNE to unsedated C-OGD.  
8 Among those having sedation for C-OGD, the preference for TNE remained but this  
9 was less strong. Of the thirteen who chose sedation, all but one had experienced a C-  
10 OGD in the past and some stated this choice was informed by past experiences of  
11 undergoing endoscopy without. All TNEs were performed without sedation, which was  
12 reported as acceptable by all participants, who described minor nasal discomfort as  
13 the predominant uncomfortable element. They had insight that having an unsedated  
14 procedure would mean *“you can go straight home”*(female, 83, Barrett’s) afterwards,  
15 making it more time-efficient and convenient. For those who had unsedated C-OGD,  
16 excessive gagging featured almost universally as well as a measure of distress that  
17 caused one patient to cry and another to state *“I wouldn’t recommend that to anyone”*  
18 (male, 65, dyspepsia). Gagging was less of an issue for TNE as described by the  
19 individual who reported, *“not so much with the nasal one but with the, with the oral*  
20 *one, it was very bad gagging reflex”* (male, 75, dyspepsia). Beyond this theme, patient  
21 experiences and accounts did not appear to be affected by their sedation status.  
22  
23  
24  
25  
26  
27  
28  
29  
30  
31  
32  
33  
34  
35  
36  
37  
38  
39  
40  
41  
42  
43  
44  
45  
46  
47

### 48 **Validity of the procedure and application to a screening population**

49  
50  
51 The EG scan has been shown to have accuracy in the detection of BO and  
52 medium/large OVs(1,2). Participants were informed of the outcome of their own  
53 endoscopic examinations but were unaware of the study findings that TNE and C-  
54 OGD results were in concordance. Participants were however encouraged to use their  
55  
56  
57  
58  
59  
60



1  
2  
3 lived experience to give an account of how important test accuracy would be to them  
4  
5 and to others. The premise was that of TNE being extended to screening individuals  
6  
7 in a community setting.  
8  
9

10  
11 For those who had a history of undergoing C-OGDs for BO and OVAs, the potential  
12  
13 accuracy of TNE was important. They described C-OGD as a ‘*necessary evil*’ but an  
14  
15 informative test for their condition which they have little choice but to undergo given  
16  
17 the reasons above. Having been briefed on the devices, one participant recognised a  
18  
19 possible limitation of the EG Scan probe- *“The nasal one, you can’t actually take*  
20  
21 *biopsies from, you can’t use that to take samples.” (male, 72, Barrett’s)* While most  
22  
23 acknowledged TNE as more comfortable, they suggested that it would only be an  
24  
25 acceptable alternative if its ability to detect abnormalities matched that of C-OGD.  
26  
27 Based on his experience, (*“the day I had them both done, I think the nasal one, I think*  
28  
29 *it missed something out” (male, 58, Barrett’s)*) one participant declared, *“I do believe*  
30  
31 *the gastroscopy one is more thorough” (male, 71, liver disease)*. Alongside this, the  
32  
33 participants emphasised the requirement for adequately trained endoscopists to  
34  
35 perform TNE and some expressed reservations over their general practitioners taking  
36  
37 up the role- *“As long as you had proficient GPs doing it” “As long as he (GP) can do*  
38  
39 *it...properly” (male, 68, Barrett’s)*. For this reason, opinion was divided on the location  
40  
41 of the test, with some preferring the specialist nature of secondary care and others  
42  
43 espousing the greater convenience and comfort of having TNE in the community.  
44  
45  
46  
47  
48  
49

### 50 51 **Sense of altruism and reciprocity** 52

53  
54 Participants used their experiences as patients and as study participants to deliver  
55  
56 unique insights into how endoscopic screening would be received by the target  
57  
58 populations. For many patients, their positive experiences of healthcare informed their  
59  
60

1  
2  
3 decision-making in becoming a research participant. *“I said yes because I was most*  
4 *grateful for what the hospital had done for me previously” (female, 59, Barrett’s), “I*  
5 *ought to try and put something back in” (female, 60, liver disease) and “I’m always*  
6 *ready to help in the progress of science” (male, 65, dyspepsia) were some statements*  
7  
8 that clearly showed the willingness of participants to use their experiences for the  
9  
10 betterment of others.  
11  
12  
13  
14  
15  
16  
17

18 The involvement of those who have undergone the procedure is an important factor in  
19  
20 establishing a screening programme. Participants suggested that prospective patients  
21  
22 would be reassured by engaging with someone who had already undergone the  
23  
24 procedure, reflecting the place of social constructionism in society’s view towards  
25  
26 healthcare screening in an overt fashion(22).  
27  
28  
29  
30  
31  
32  
33  
34  
35  
36  
37  
38  
39  
40  
41  
42  
43  
44  
45  
46  
47  
48  
49  
50  
51  
52  
53  
54  
55  
56  
57  
58  
59  
60

## Discussion

This research represents the first time that a qualitative study has been conducted into the experiences of patients undergoing transnasal endoscopy for screening of gastrointestinal conditions. The aim of this research was not to contrast one endoscopic mode with the other, as each has its own applicability in clinical practice, but to consider the acceptability of TNE in screening of high risk individuals. The additional information derived from a qualitative as compared to a quantitative means of assessing acceptability (eg VAS or structured questionnaire) allows for deeper interpretation of a patient's perspective. The themes identified in this study support the view that TNE could be acceptable to a screening population, thus fulfilling an important principle of a viable screening programme(23).

The community of inquiry theory is a concept that unites the themes identified in this study(24). The background is that TNE is shown to be accurate and safe in the delivery of BO and OV assessment but the problem remains that not enough is deeply understood about its acceptability to a population. To explore the challenges and advantages offered by TNE in the screening of BO and OVs, male and female participants of different ages and for different reasons underwent the same procedure. Their individual perspectives were all considered and conclusions that reflect this community's account were arrived at, which will hopefully contribute to improved delivery of patient care. For the purposes of this study all of the accounts were communicated through the researchers but they are reflective of the conversations that may exist in the greater population.

To the participants, the notion of an accurate test that was superior in comfort and convenience was appealing. They could see the benefits that this could bring a wider

1  
2  
3 population and were pleased to be part of a community that could enhance other  
4 patients' experiences. The greater mutualism and control that TNE seems to bring in  
5 contrast to C-OGD made it more appealing, which could be important in achieving  
6 adequate uptake of in a screening population. It must of course be noted that the  
7 theme of 'inclusivity in one's own healthcare' that arose from the interviews is within a  
8 study setting of participants who volunteered to undergo TNE, in contrast with a  
9 screening population who may feel less able to decline. The evidence from the  
10 accounts nevertheless supports the impression that TNE can enhance a feeling of  
11 involvement, which is an important factor in uptake and concordance. In a public health  
12 setting, inclusivity and a sense of community of which altruism is a component, are  
13 essential factors affecting patient involvement. Questions for the use of TNE as a  
14 screening tool remain. The inability of the EG Scan system to allow biopsies was one  
15 recurring concern for participants, and nasal discomfort is a significant drawback.  
16 There is evidence for higher comfort levels during endoscopy when thinner  
17 endoscopes (6 mm or less in diameter) are used, whether transnasally or transorally  
18 and a different device might be used to achieve this(25).

19  
20  
21  
22  
23  
24  
25  
26  
27  
28  
29  
30  
31  
32  
33  
34  
35  
36  
37  
38  
39  
40  
41 Contradicting views emergent from the data also provide important insights. The  
42 minority of participants who did not wish to view endoscopic images, those who would  
43 prefer C-OGD as a screening tool because of its established nature and individuals  
44 who would prefer to attend hospital for TNE rather than the community, all had valid  
45 reasons that warrant consideration. The participants realised that, as individuals who  
46 had pre-existing conditions or symptoms requiring OGD examination, they differed  
47 from a screening population, making direct comparisons impossible. Some of the  
48 reasons given for preferring aspects of C-OGD over TNE are indeed based in existing  
49 practices e.g. oesophageal biopsies in BO using C-OGD.  
50  
51  
52  
53  
54  
55  
56  
57  
58  
59  
60

1  
2  
3 Qualitative research of patients undergoing C-OGD alone for BO reflect themes of  
4 comfort and control being important to them, which aligns well with our findings(26).  
5  
6  
7 Additionally, qualitative analysis of interviews has been conducted to gain an insight  
8 into factors affecting adherence to endoscopic screening, which would be a major  
9 factor in establishing an effective service(27). A clearer view of the population's  
10 interpretation of such an intervention may enhance the confidence of healthcare  
11 providers to establish a screening programme with TNE at its core.  
12  
13  
14  
15  
16  
17  
18  
19  
20  
21  
22

## 23 **Conclusions**

24  
25  
26  
27 The information collected in this patient-centred qualitative study has identified four  
28 main themes underlying the expectations and experiences of those undergoing TNE  
29 and C-OGD. They are inclusivity in one's own health care, comfort level and  
30 convenience, validity of the procedure and application to a screening population, and  
31 a sense of altruism and reciprocity. We believe that this analysis is a credible  
32 reflection of the experiences of the patients involved and that it provides insights into  
33 the opportunities and challenges for interventions offered to patients selected as  
34 'high risk' and therefore considered for screening. These insights could not have  
35 arisen from quantitative analyses of acceptability and highlight the strengths of  
36 qualitative methods to optimise clinical care. The themes align with the original  
37 study's VAS outcomes in suggesting that unsedated TNE is potentially acceptable  
38 and may reflect the experiences of high risk screening populations within the wider  
39 community.  
40  
41  
42  
43  
44  
45  
46  
47  
48  
49  
50  
51  
52  
53  
54  
55  
56  
57  
58  
59  
60

1  
2  
3 **Figure 1. The EG Scan™ II system. (A) the portable case with four main parts;**  
4 **(B) the image processor (top left), disposable probe (top right), air tube**  
5 **(bottom right) and hand-held controller (bottom left); (C) the system connected**  
6 **and ready for use; (D) close view of the capsule probe tip. (Reproduced with**  
7 **permission from Sami SS, et al. Copyright John Wiley and Sons).**  
8  
9  
10  
11  
12  
13

#### 14 **Author Contributions**

15  
16  
17 John J. McGoran: contributed to analysis, interpretation of data and drafted the  
18 manuscript.  
19

20  
21 Andrea Bennett: contributed to the acquisition of data and critical revision of the  
22 manuscript for important intellectual content.  
23

24  
25 Joanne Cooper: contributed to acquisition of data, interpretation of data and critical  
26 revision of the manuscript for important intellectual content.  
27

28  
29 John de Caestecker: contributed to the study supervision, interpretation of data and  
30 critical revision of the manuscript for important intellectual content.  
31

32  
33 Laurence B. Lovat: contributed to the study supervision, interpretation of data and  
34 critical revision of the manuscript for important intellectual content.  
35

36  
37 Indra Neil Guha: contributed to the acquisition of data, study supervision,  
38 interpretation of data and critical revision of the manuscript for important intellectual  
39 content.  
40

41  
42 Krish Ragnath: contributed to the conception, design and supervision of the study,  
43 acquisition of data, study supervision, interpretation of data and critical revision of  
44 the manuscript for important intellectual content.  
45

46  
47 Sarmed S. Sami: contributed to the conception, design and supervision of the study,  
48 acquisition of data; analysis; interpretation of data; and critical revision of the  
49 manuscript for important intellectual content.  
50  
51  
52  
53  
54  
55  
56  
57  
58  
59  
60

### **Potential Conflicts of Interest**

Dr. S. S. Sami was funded by an Olympus-Core National Endoscopy Research Fellowship grant, Core Charity, United Kingdom (grant number: RB4803). This study was part funded by a grant from Intromedic Ltd, Seoul, South Korea.

Professor Krish Ragunath is a research grant recipient from Intromedic Ltd, Seoul, South Korea.

The other authors have no conflicts of interest to declare relevant to this publication.

### **Funding**

No direct funding has been received for this qualitative project. The two research grants described above concerned the original quantitative study.

### **Data Availability**

Extra data can be accessed via the Dryad data repository at <http://datadryad.org/> with the doi: doi:10.5061/dryad.wdbrv15jb

## References

1. Sami SS, Iyer PG, Pophali P, Halland M, di Pietro M, Ortiz-Fernandez-Sordo J, et al. Acceptability, Accuracy, and Safety of Disposable Transnasal Capsule Endoscopy for Barrett's Esophagus Screening. *Clin Gastroenterol Hepatol* 2018
2. Sami SS, Ragunath K, Wilkes EA, James M, Mansilla-Vivar R, Ortiz-Fernández-Sordo J, et al. The detection of oesophageal varices using a novel, disposable, probe-based transnasal endoscope: a prospective diagnostic pilot study. *Liver Int.* 2016;36(11):1639–48.
3. Shaheen NJ, Falk GW, Iyer PG. ACG Clinical Guideline : Diagnosis and Management of Barrett ' s Esophagus. 2015;(March):1–21.
4. Garcia-tsoo G, Abraldes JG, Berzigotti A, Bosch J. Portal Hypertensive Bleeding in Cirrhosis : Risk Stratification , Diagnosis , and Management : 2016 Practice Guidance by the American Association for the Study of Liver Diseases A . Purpose and Scope. *Hepatology.* 2017;65(1):310–35.
5. Tripathi D, Stanley AJ, Hayes PC, Patch D, Millson C, Mehrzad H, et al. UK guidelines on the management of variceal haemorrhage in cirrhotic patients. *Gut.* 2015;64(11):1680–704.
6. Fitzgerald RC, Di Pietro M, Ragunath K, Ang Y, Kang JY, Watson P, et al. British Society of Gastroenterology guidelines on the diagnosis and management of Barrett's oesophagus. *Gut.* 2014;63(1):7–42.
7. Hayeck TJ, Kong CY, Spechler SJ, Scott Gazelle G, Hur C. The Prevalence of Barrett's Esophagus in the US: Estimates from a Simulation Model Confirmed by SEER Data. *Dis. Esophagus* 2010;23(6):451-457
8. Thomopoulos K, Theocharis G, Mimidis K, Lampropoulou-Karatza C, Alexandridis E, Nikolopoulou V. Improved survival of patients presenting with acute variceal bleeding Prognostic indicators of short-and long-term mortality. *Dig. Liv. Dis.* 2006;38:899-904
9. Dunkley I, Griffiths H, Follows R, Ball A, Collins M, Dodds P, et al. UK consensus on



- 1  
2  
3 non-medical staffing required to deliver safe, quality-assured care for adult patients  
4  
5 undergoing gastrointestinal endoscopy. *Frontline Gastroenterol* 2018;0:1-11  
6  
7  
8 10. Cohen LB, Delegge MH, Aisenberg J, Brill J V, Inadomi JM, Kochman ML, et al. AGA  
9  
10 Institute Review of Endoscopic Sedation. *Gastroenterol.* 2007;133:675-701  
11  
12 11. Kruijshaar ME, Kerkhof M, Siersema PD, Steyerberg EW, Homs MY V, Essink-Bot M-  
13  
14 L, et al. The burden of upper gastrointestinal endoscopy in patients with Barrett's  
15  
16 esophagus. *Endoscopy.* 2006;38(09):873–8.  
17  
18 12. Beg S, Ragunath K, Wyman A, Banks M, Trudgill N, Pritchard MD, et al. Quality  
19  
20 standards in upper gastrointestinal endoscopy: A position statement of the British  
21  
22 Society of Gastroenterology (BSG) and Association of Upper Gastrointestinal  
23  
24 Surgeons of Great Britain and Ireland (AUGIS). *Gut.* 2017;66(11):1886–99.  
25  
26 13. Aedo MR, Zavala-González MÁ, Meixueiro-Daza A, María J, María R-T, Aedo R.  
27  
28 Accuracy of transnasal endoscopy with a disposable esophagoscope compared to  
29  
30 conventional endoscopy. *World J Gastrointest Endosc* 2014;6(4):128-136  
31  
32 14. Honing J, Kievit W, Bookelaar J, Peters Y, Iyer PG, Siersema PD. Endosheath  
33  
34 ultrathin transnasal endoscopy is a cost-effective method for screening for Barrett's  
35  
36 esophagus in patients with GERD symptoms. *Gastrointest Endosc* 2018  
37  
38  
39 15. Blevins CH, Egginton JS, Shah ND, Johnson ML, Iyer PG. Comparative Assessment  
40  
41 of Patient Preferences and Tolerability in Barrett Esophagus Screening: Results From  
42  
43 a Randomized Trial. *J Clin Gastroenterol.* 2018;52(10).  
44  
45 16. Likert R. A Technique for the Measurement of Attitudes. *Archives of Psychology*  
46  
47 1932;22(140):55  
48  
49 17. Marteau T, Bekker H. The development of a six-item short-form of the state scale of  
50  
51 the Spielberger State-Trait Anxiety Inventory (STAI). *Br J Clin Psychol.* 1992;31(Part  
52  
53 3):301–6.  
54  
55 18. Guest G, Bunce A, Johnson L. How Many Interviews Are Enough?: An Experiment  
56  
57 with Data Saturation and Variability. *Field methods.* 2006;18(1):59–82.  
58  
59 19. Tong A, Sainsbury P, Craig J. Consolidated criteria for reporting qualitative research  
60

- 1  
2  
3 (COREQ): a 32-item checklist for interviews and focus groups. *Int J Qual Heal care*.  
4  
5 2007;19(6):349–57.  
6  
7 20. Braun V, Clarke V, Terry G. Thematic analysis. *Qual Res Clin Heal Psychol*.  
8  
9 2014;24:95–114.  
10  
11 21. Barbour RS. Checklists for improving rigour in qualitative research: a case of the tail  
12 wagging the dog? *BMJ*. 2001;322(7294):1115.  
13  
14 22. Calvo A, McCormack Brown K, McDermott RJ, Bryant CA, Coreil J, Loseke D. Social  
15 Construction of Cervical Cancer Screening among Panamanian Women. *Am J Heal*  
16 *Educ* 2012 May;43(3):153–63.  
17  
18 23. Wilson JMG, Jungner G. Principles and Practice of Screening for Disease. World  
19 Health Organization 1968.  
20  
21 24. Garrison, D. R. and Anderson, T. (2003)E-Learning in the 21stCentury: A Framework  
22 for Research and Practice. London: Routledge/Falmer, 2003  
23  
24 25. Lin L-F, Ma K-Z, Tu H-L. A prospective randomized study comparing transnasal and  
25 peroral 5-mm ultrathin endoscopy. *J Formos Med Assoc* 2014;113:371–6.  
26  
27 26. Arney J, Hinojosa-Lindsey M, Street RL, Hou J, El-Serag HB, Naik AD. Patient  
28 Experiences with Surveillance Endoscopy: A Qualitative Study. *Dig Dis Sci* 2014  
29 Jul;59(7):1378–85.  
30  
31 27. Sly JR, Edwards T, Shelton RC, Jandorf L. Identifying Barriers to Colonoscopy  
32 Screening for Nonadherent African American Participants in a Patient Navigation  
33 Intervention. *Heal Educ Behav* 2012 Oct 19;40(4):449–57.  
34  
35  
36  
37  
38  
39  
40  
41  
42  
43  
44  
45  
46  
47  
48  
49  
50  
51  
52  
53  
54  
55  
56  
57  
58  
59  
60

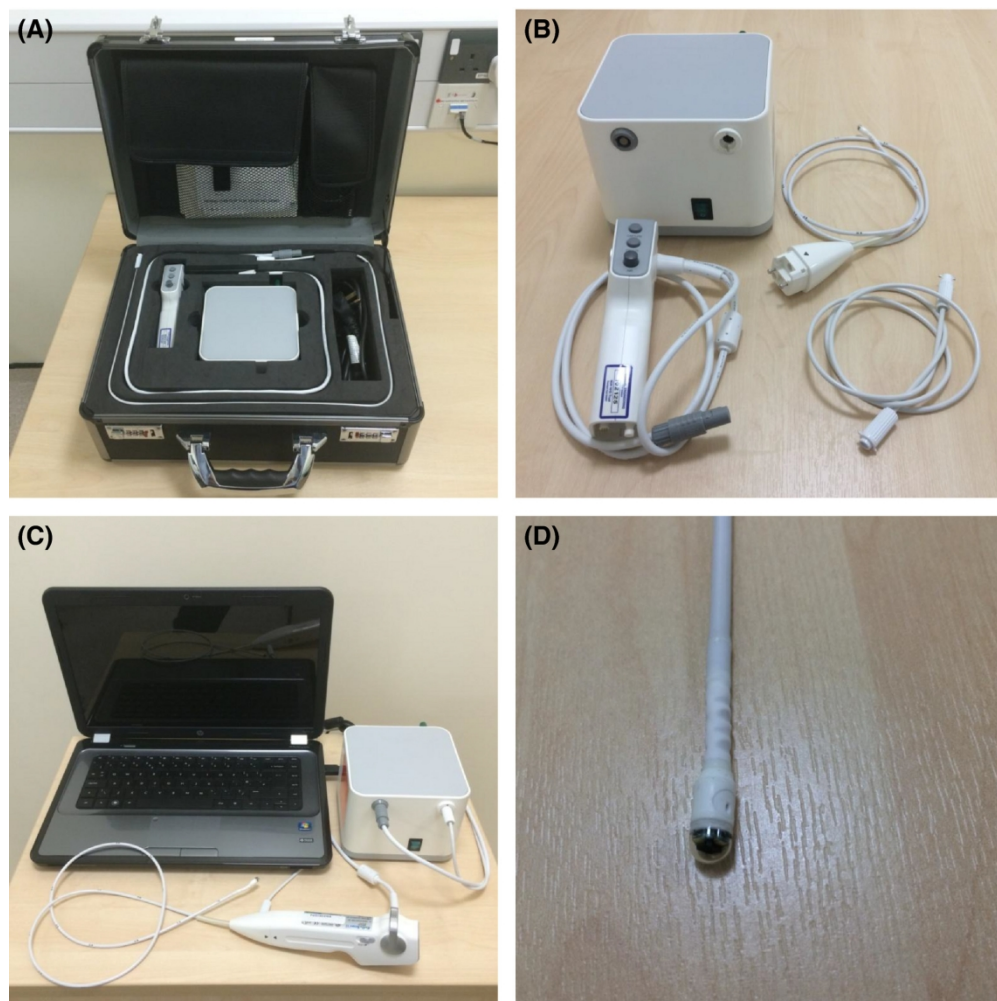

Figure 1. The EG ScanTM II system. (A) the portable case with four main parts; (B) the image processor (top left), disposable probe (top right), air tube (bottom right) and hand-held controller (bottom left); (C) the system connected and ready for use; (D) close view of the capsule probe tip. (Reproduced with permission from Sami SS, et al. Copyright John Wiley and Sons).

## COREQ (COnsolidated criteria for REporting Qualitative research) Checklist

A checklist of items that should be included in reports of qualitative research. You must report the page number in your manuscript where you consider each of the items listed in this checklist. If you have not included this information, either revise your manuscript accordingly before submitting or note N/A.

| Topic                                          | Item No. | Guide Questions/Description                                                                                                                              | Reported on Page No. |
|------------------------------------------------|----------|----------------------------------------------------------------------------------------------------------------------------------------------------------|----------------------|
| <b>Domain 1: Research team and reflexivity</b> |          |                                                                                                                                                          |                      |
| <i>Personal characteristics</i>                |          |                                                                                                                                                          |                      |
| Interviewer/facilitator                        | 1        | Which author/s conducted the interview or focus group?                                                                                                   |                      |
| Credentials                                    | 2        | What were the researcher's credentials? E.g. PhD, MD                                                                                                     |                      |
| Occupation                                     | 3        | What was their occupation at the time of the study?                                                                                                      |                      |
| Gender                                         | 4        | Was the researcher male or female?                                                                                                                       |                      |
| Experience and training                        | 5        | What experience or training did the researcher have?                                                                                                     |                      |
| <i>Relationship with participants</i>          |          |                                                                                                                                                          |                      |
| Relationship established                       | 6        | Was a relationship established prior to study commencement?                                                                                              |                      |
| Participant knowledge of the interviewer       | 7        | What did the participants know about the researcher? e.g. personal goals, reasons for doing the research                                                 |                      |
| Interviewer characteristics                    | 8        | What characteristics were reported about the interviewer/facilitator? e.g. Bias, assumptions, reasons and interests in the research topic                |                      |
| <b>Domain 2: Study design</b>                  |          |                                                                                                                                                          |                      |
| <i>Theoretical framework</i>                   |          |                                                                                                                                                          |                      |
| Methodological orientation and Theory          | 9        | What methodological orientation was stated to underpin the study? e.g. grounded theory, discourse analysis, ethnography, phenomenology, content analysis |                      |
| <i>Participant selection</i>                   |          |                                                                                                                                                          |                      |
| Sampling                                       | 10       | How were participants selected? e.g. purposive, convenience, consecutive, snowball                                                                       |                      |
| Method of approach                             | 11       | How were participants approached? e.g. face-to-face, telephone, mail, email                                                                              |                      |
| Sample size                                    | 12       | How many participants were in the study?                                                                                                                 |                      |
| Non-participation                              | 13       | How many people refused to participate or dropped out? Reasons?                                                                                          |                      |
| <i>Setting</i>                                 |          |                                                                                                                                                          |                      |
| Setting of data collection                     | 14       | Where was the data collected? e.g. home, clinic, workplace                                                                                               |                      |
| Presence of non-participants                   | 15       | Was anyone else present besides the participants and researchers?                                                                                        |                      |
| Description of sample                          | 16       | What are the important characteristics of the sample? e.g. demographic data, date                                                                        |                      |
| <i>Data collection</i>                         |          |                                                                                                                                                          |                      |
| Interview guide                                | 17       | Were questions, prompts, guides provided by the authors? Was it pilot tested?                                                                            |                      |
| Repeat interviews                              | 18       | Were repeat interviews carried out? If yes, how many?                                                                                                    |                      |
| Audio/visual recording                         | 19       | Did the research use audio or visual recording to collect the data?                                                                                      |                      |
| Field notes                                    | 20       | Were field notes made during and/or after the interview or focus group?                                                                                  |                      |
| Duration                                       | 21       | What was the duration of the interviews or focus group?                                                                                                  |                      |
| Data saturation                                | 22       | Was data saturation discussed?                                                                                                                           |                      |
| Transcripts returned                           | 23       | Were transcripts returned to participants for comment and/or                                                                                             |                      |

| Topic                                  | Item No. | Guide Questions/Description                                                                                                        | Reported on Page No. |
|----------------------------------------|----------|------------------------------------------------------------------------------------------------------------------------------------|----------------------|
|                                        |          | correction?                                                                                                                        |                      |
| <b>Domain 3: analysis and findings</b> |          |                                                                                                                                    |                      |
| <i>Data analysis</i>                   |          |                                                                                                                                    |                      |
| Number of data coders                  | 24       | How many data coders coded the data?                                                                                               |                      |
| Description of the coding tree         | 25       | Did authors provide a description of the coding tree?                                                                              |                      |
| Derivation of themes                   | 26       | Were themes identified in advance or derived from the data?                                                                        |                      |
| Software                               | 27       | What software, if applicable, was used to manage the data?                                                                         |                      |
| Participant checking                   | 28       | Did participants provide feedback on the findings?                                                                                 |                      |
| <i>Reporting</i>                       |          |                                                                                                                                    |                      |
| Quotations presented                   | 29       | Were participant quotations presented to illustrate the themes/findings?<br>Was each quotation identified? e.g. participant number |                      |
| Data and findings consistent           | 30       | Was there consistency between the data presented and the findings?                                                                 |                      |
| Clarity of major themes                | 31       | Were major themes clearly presented in the findings?                                                                               |                      |
| Clarity of minor themes                | 32       | Is there a description of diverse cases or discussion of minor themes?                                                             |                      |

Developed from: Tong A, Sainsbury P, Craig J. Consolidated criteria for reporting qualitative research (COREQ): a 32-item checklist for interviews and focus groups. *International Journal for Quality in Health Care*. 2007. Volume 19, Number 6: pp. 349 – 357

**Once you have completed this checklist, please save a copy and upload it as part of your submission. DO NOT include this checklist as part of the main manuscript document. It must be uploaded as a separate file.**
